1  
2 **Autotrophic biofilms sustained by deeply-sourced groundwater host diverse CPR**  
3 **bacteria implicated in sulfur and hydrogen metabolism**  
4

5 Luis E. Valentin Alvarado<sup>1,2</sup>, Sirine C. Fakra<sup>3</sup>, Alexander J. Probst<sup>4,#</sup>, Jonathan R. Giska<sup>4,^</sup>,  
6 Alexander L. Jaffe<sup>1</sup>, Luke M. Oltrogge<sup>5</sup>, Jacob West-Roberts<sup>6</sup>, Joel Rowland<sup>4,+</sup>, Michael Manga<sup>4</sup>,  
7 David F. Savage<sup>2,5</sup>, Chris Greening<sup>7</sup>, Brett J. Baker<sup>8,9</sup>, Jillian F. Banfield<sup>2,4,6,9,10\*</sup>  
8

9 <sup>1</sup>Graduate Group in Microbiology, University of California, Berkeley, CA, USA

10 <sup>2</sup>Innovative Genomics Institute, University of California, Berkeley, CA, USA

11 <sup>3</sup>Advanced Light Source, Lawrence Berkeley National Laboratory, Berkeley, CA, USA

12 <sup>4</sup>Earth and Planetary Science, University of California, Berkeley, CA, USA

13 <sup>5</sup>Department of Molecular and Cell Biology, University of California, Berkeley, CA, USA

14 <sup>6</sup>Environmental Science, Policy and Management, University of California, Berkeley, CA, USA

15 <sup>7</sup>Department of Microbiology, Biomedicine Discovery Institute, Monash University, Clayton,  
16 Australia

17 <sup>8</sup>Department of Integrative Biology, University of Texas, Austin, USA

18 <sup>9</sup>Department of Marine Science, University of Texas, Austin, USA

19 <sup>10</sup>Energy Geoscience Division, Lawrence Berkeley National Laboratory, Berkeley, CA, USA.  
20

21 Current Addresses:

22 <sup>#</sup>Research Center One Health Ruhr, Research Alliance Ruhr, Environmental Metagenomics

23 <sup>+</sup>Earth and Env. Sciences Division, Los Alamos National Laboratory, Los Alamos, NM, USA  
24 University of Duisburg-Essen, Universitätsstraße 5, 45141 Essen, Germany

25 <sup>^</sup>Cleaner Air Oregon Program, Oregon Department of Environmental Quality  
26

27  
28 \*corresponding author: [jbanfield@berkeley.edu](mailto:jbanfield@berkeley.edu)  
29  
30  
31  
32  
33  
34  
35  
36  
37  
38  
39  
40  
41  
42  
43

44 **Abstract**

45

46 **Background:** Candidate Phyla Radiation (CPR) bacteria are commonly detected yet enigmatic  
47 members of diverse microbial communities. Their host associations, metabolic capabilities, and  
48 potential roles in biogeochemical cycles remain under-explored. We studied  
49 chemoautotrophically-based biofilms that host diverse CPR bacteria and grow in sulfide-rich  
50 springs using bulk geochemical analysis, genome-resolved metagenomics and scanning  
51 transmission x-ray microscopy (STXM) at room temperature and 87° K.

52

53 **Results:** CPR-affiliated Gracilibacteria, Absconditabacteria, Saccharibacteria, Peregrinibacteria,  
54 Berkelbacteria, Microgenomates, and Parcubacteria are members of two biofilm communities  
55 dominated by chemolithotrophic sulfur-oxidizing bacteria including *Thiothrix* or *Beggiatoa*. STXM  
56 imaging revealed ultra-small cells along the surfaces of filamentous bacteria that we interpret are  
57 CPR bacterial episymbionts. STXM and NEXAFS spectroscopy at carbon K and sulfur L<sub>2,3</sub> edges  
58 show protein-encapsulated elemental sulfur spherical granules associated with filamentous  
59 bacteria, indicating that they are sulfur-oxidizers, likely *Thiothrix*. Berkelbacteria and  
60 Moranbacteria in the same biofilm sample are predicted to have a novel electron bifurcating group  
61 3b [NiFe]-hydrogenase, putatively a sulfhydrogenase, potentially linked to sulfur metabolism via  
62 redox cofactors. This complex could potentially underpin a symbiosis involving Berkelbacteria  
63 and/or Moranbacteria and filamentous sulfur-oxidizing bacteria such as *Thiothrix* that is based on  
64 cryptic sulfur cycling. One Doudnabacteria genome encodes adjacent sulfur dioxygenase and  
65 rhodanese genes that may convert thiosulfate to sulfite. We find similar conserved genomic  
66 architecture associated with CPR bacteria from other sulfur-rich subsurface ecosystems.

67

68 **Conclusions:** Our combined metagenomic, geochemical, spectromicroscopic and structural  
69 bioinformatics analyses link some CPR bacteria to sulfur-oxidizing Proteobacteria, likely *Thiothrix*,  
70 and indicate roles for CPR bacteria in sulfur and hydrogen cycling.

71

72 **Keywords:** Candidate Phyla Radiation, groundwater microbiome, synchrotron-based  
73 spectromicroscopy

74

75

76

77

78

79

80

81

82

83

84

85

86

## 87 **Background**

88

89 Sulfur is the fifth most abundant element on earth and the sulfur cycle is a key component of  
90 Earth's interlinked biogeochemical cycles[1,2]. In natural ecosystems, sulfur exists in several  
91 oxidation states, -2, 0, +2, +4 and +6 being the most common, in the forms of polysulfide ( $\text{HS}_x$  or  
92  $\text{S}_x^{2-}$ ; -2,0), thiosulfate ( $\text{S}_2\text{O}_3^{2-}$ ; -1,+5), tetrathionate ( $\text{S}_4\text{O}_6^{2-}$ ; -2,+6), sulfite ( $\text{SO}_3^{2-}$ ; +4) and sulfate  
93 ( $\text{SO}_4^{2-}$ ; +6). Microbes play an important role in sulfur cycling in aqueous and soil environments.  
94  $\text{H}_2\text{S}$  is also a toxic compound that must be maintained at low levels for the sustained growth of  
95 microbial consortia, thus microbial sulfide oxidation is beneficial at the community level.

96 Sulfide ( $\text{S}^{2-}$ ) is common in natural springs and can serve as a source of energy and  
97 reducing power for chemolithoautotrophic microorganisms. Chemolithoautotrophic microbial  
98 communities with members that carry out the oxidation, reduction and disproportionation of sulfur  
99 compounds are found in environments such as hydrothermal vents[3,4], water column oxic/anoxic  
100 interfaces[5–7], terrestrial caves[8–10], groundwater[11,12] and activated sludge[13]. Sulfur-  
101 based chemoautotrophic cave mats are dominated by filamentous *Campylobacterota* in  
102 environments with high  $\text{S}^{2-}/\text{O}_2$  (>150) ratios, whereas *Gammaproteobacteria* (*Beggiatoales* and  
103 *Thiothrixales*) are prevalent at lower  $\text{S}^{2-}/\text{O}_2$  (<75) ratios[9]. *Beggiatoaceae* and *Thiothrixaceae*  
104 that have been cultivated have been shown to use hydrogen sulfide either mixotrophically or  
105 heterotrophically [14–17]. *Beggiatoa spp.* are gliding filamentous bacteria that form  $\text{S}^0$  spherical  
106 granules that they may oxidize to sulfate when  $\text{H}_2\text{S}$  supply becomes limited [18]. *Thiothrix spp.* are  
107 gliding bacteria that can grow as long filaments (cells in a microtubular sheath) and are known to  
108 accumulate  $\text{S}^0$  spherical granules when in the presence of reduced sulfur[13,19] and organics  
109 (energy and carbon source) [14]. Prior work[20–24] indicate that sulfur-oxidizing bacteria support  
110 communities by providing resources such as fixed carbon and nitrogen.

111 To date, most studies of sulfur-based chemoautotrophic ecosystems have investigated  
112 the roles of the relatively most abundant organisms. However, it is well understood that microbial  
113 biofilms are structured as networks of interacting organisms, some of which are fundamentally  
114 dependent on other community members. Of particular interest are Candidate Phyla Radiation  
115 (CPR) bacteria (also known as Patescibacteria) [25–28] that can form symbioses with host  
116 organisms [29–31]. Prior surveys have documented CPR bacteria in sulfur-based communities  
117 [25,32,33], yet the nature of CPR-host relationships and the roles of CPR in sulfur-based  
118 communities remain under-explored.

119 Here, we studied chemoautotrophic microbial communities sustained by sulfur  
120 metabolism in two mineral springs MS4 and MS11[34] at Alum Rock Park, CA, USA, where  
121 sulfide-rich groundwater discharges along the Hayward fault. We profiled oxygen isotopes,  
122 temperature, water composition and spring discharge rates to constrain the sources of water and  
123 further combined genome-resolved metagenomics with electron microscopy and X-ray  
124 spectromicroscopy to investigate metabolic capacities, interdependencies, and structure of the  
125 microbial biofilm community at these two springs. Synchrotron-based spectromicroscopy  
126 evidenced the close association between ultra-small cells, inferred to be CPR bacteria, and sulfur-  
127 oxidizing bacteria that underpin this chemoautotrophic ecosystem. We predict the contributions  
128 of the major community members to carbon, nitrogen, hydrogen and sulfur cycling and investigate  
129 the potential roles of the abundant and diverse CPR bacteria in these consortia.

130

## 131 **Materials and Methods**

132

### 133 **Site Description and Microbial biomass collection**

134

135 The spring system is located along Penitencia Creek in Alum Rock Park, San Jose, CA  
136 (37°23'57.7"N, 121°47'48.8"W) (**Fig. 1A**). The two sample sites, Mineral Springs 4 and 11 (MS4  
137 and MS11) are located on opposite sides of the creek approximately 250 m from one another  
138 (**Fig. 1B-C**). Samples for geochemical analyses and 16S rRNA gene sequencing were taken in  
139 May 2005, during the dry season, and were filtered on-site using sterile 0.2 µm filters. Biofilm  
140 samples for scanning electron microscopy were collected from both sites using sterile pipettes.  
141 Solutions were acidified with 3% nitric acid for cation analyses. Samples were transported back  
142 to the laboratory on ice. Biofilm samples for metagenomic sequencing were collected on  
143 November 1, 2012 and July 2, 2019 and July 24, 2020. Planktonic samples were collected June  
144 10, 2015 and July 24, 2020. Two sets of planktonic samples were taken by sequentially filtering  
145 379 L and 208 L of water, respectively, from the MS4 spring onto 0.65 µm and 0.1 µm large  
146 volume filters (Gravertech 5 inch ZTEC-G filter). Filters were frozen on dry ice at the site and  
147 stored at -80°C for genome-resolved metagenomic analyses. For synchrotron measurements  
148 (STXM and X-ray microprobe), thin white streamers were collected in June 2015 with sterile  
149 tweezers at both sites and transported in falcon tubes on ice. Samples were then thawed and  
150 immediately deposited either onto a Si<sub>3</sub>N<sub>4</sub> window (TEM windows) or a Cu TEM grid (300 mesh,  
151 Ted Pella). Samples were then plunged in liquid nitrogen for cryogenic measurements, gas  
152 ethane (used for flash-freezing) was not available at the time of sampling. For all synchrotron-  
153 based measurements, samples were not rinsed or spinned so as to preserve the structural  
154 integrity of the filaments and preserve the CPR bacteria-bacteria-filaments spatial relationships.

155

### 156 **Geochemical Analysis**

157

158 Water discharge (volume/time) was measured by diverting water into either a bucket or graduated  
159 cylinder to measure volume, and time was recorded with a stopwatch. Temperature was  
160 measured with a type K thermocouple until February 2008 and thereafter with a thermistor.  
161 Accuracy is 0.2 °C and 0.1 °C, respectively. Water for O and H isotope measurements was  
162 collected in 250 mL Nalgene bottles. Discharge and temperature were not measured if outflow  
163 channels from the springs backed up to create pools of water. Cation analysis was performed on  
164 a PerkinElmer 5300 DV optical emission ICP with autosampler. Anion analysis was performed  
165 on-site using a HACH DR2010 spectrophotometer with protocols provided by the manufacturer.  
166 O and H isotopes were measured with a GV IsoPrime gas source mass spectrometer, with  
167 analytical precision of approximately 0.1 and 1 permil, respectively.

168

### 169 **Scanning Electron Microscopy**

170

171 Scanning electron microscopy samples were fixed for two hours in a 2% glutaraldehyde solution  
172 (in 0.1 M sodium cacodylate buffer) according to a standard protocol, then vacuum aspirated onto  
173 0.22 µm polycarbonate filters (Osmonics, poretics, 47 mm, Catalog number K02CP04700), and  
174 rinsed three times in 0.1 M sodium cacodylate buffer. The samples were then dehydrated in

175 successive ethanol baths of increasing concentration and finally dried using a Tousimis  
176 AutoSamdri 815 Critical Point Dryer for approximately one hour. Specimens were mounted on  
177 gold stubs and sputter coated with a gold/palladium mix. Imaging was performed on a Hitachi S-  
178 5000 scanning electron microscope at 10 keV at UC Berkeley.

179

## 180 **Scanning Transmission X-ray Microscopy (STXM)**

181

182 STXM and near edge x-ray absorption fine structure (NEXAFS) spectroscopy measurements  
183 were performed on the soft X-ray undulator beamline 11.0.2[35] of the Advanced Light Source  
184 (ALS), Berkeley, CA, USA. Data were recorded with the storage ring operating in top-off mode at  
185 500 mA, 1.9 GeV. Samples were thawed right before STXM-NEXAFS measurements at ambient  
186 temperature under He at pressure <1 atm. A Fresnel zone plate lens (40 nm outer zones) was  
187 used to focus a monochromatic soft X-ray beam onto the sample. The sample was raster-scanned  
188 in 2D through the fixed beam and transmitted photons were detected with a phosphor scintillator-  
189 photomultiplier assembly; incident photon counts were kept below 10 MHz. The imaging contrast  
190 relies on the excitation of core electrons by X-ray absorption [36–38]. STXM images recorded at  
191 energies just below and at the elemental absorption edge (S L<sub>3</sub> and C K) were converted into  
192 optical density (OD) images where the OD for a given energy can be expressed from the Beer-  
193 Lambert law, for a given X-ray energy, as  $OD = -\ln(I/I_0) = \mu \rho t$ , where  $I$ ,  $I_0$ ,  $\mu$ ,  $\rho$  and  $t$  are the  
194 transmitted intensity through the sample, incident intensity, mass absorption coefficient, density  
195 and sample thickness, respectively. Protein, carbon and elemental sulfur maps were obtained by  
196 taking the difference of OD images at 280 and 288.2 eV, at 280 and 305 eV, and at 162 and 163.9  
197 eV respectively. Image sequences ('stacks') recorded at energies spanning the S L<sub>2,3</sub>-edges (160-  
198 180 eV) with steps of 0.3 eV around the L<sub>3</sub>-edge, and C K-edge (280-305 eV) with steps of 0.12  
199 eV around the K-edge were used to obtain NEXAFS spectra from specific regions. S 2p NEXAFS  
200 spectral features are affected by spin-orbit splitting and molecular field, and provide information  
201 on the oxidation state of sulfur.

202 Additionally, STXM-NEXAFS measurements at 87° K were performed on frozen-hydrated  
203 samples so as to preserve sample chemical and structural integrity[39] and minimize beam-  
204 induced radiation damage. These samples were cryo-transferred through a specimen chamber  
205 (<100 mTorr) into an LN<sub>2</sub>-cooled stage (87°K) inside the STXM operated with a scanning Fresnel  
206 zone plate lens (60 nm outer zones), under vacuum (10<sup>-6</sup> torr). With this setup, the sample is not  
207 rastered-scanned so as to minimize sample vibrations, instead the zone plate is scanned in 2D.  
208 Note that sulfur L<sub>2,3</sub> -edges could not be accessed in this configuration due to geometrical  
209 constraints.

210 At least two different sample regions were analyzed at each elemental edge and beam-  
211 induced radiation damage was carefully checked. The theoretical spectral and spatial resolutions  
212 during measurements were +/-100 meV ; 40 nm and 60 nm respectively. The photon energy was  
213 calibrated at the C K-edge using the Rydberg transition of gaseous CO<sub>2</sub> at 292.74 eV (C 1s→ 3s

214 (v = 0)). Sulfur spectra were calibrated using the S 2p<sub>3/2</sub> edge of elemental sulfur set at 163.9 eV.

215 An elemental sulfur standard spectrum was kindly provided by Geraldine Sarret (University  
216 Grenoble Alpes, France). All data was processed with the aXis2000 software version 06 Jul 2021  
217 (<http://unicorn.mcmaster.ca/aXis2000.html>).

## 218 **X-ray fluorescence microprobe (XFM)**

219  
220 Synchrotron XFM measurements were performed in cryogenic conditions (95°K) at ALS XFM  
221 beamline 10.3.2[40], with the storage ring operating in top-off mode at 500 mA, 1.9 GeV. Micro-  
222 focused X-ray fluorescence ( $\mu$ XRF) elemental mapping was performed on LN<sub>2</sub>-frozen hydrated  
223 samples oriented at 45° to the incident X-ray beam, samples were cryo-transferred into a LN<sub>2</sub>-  
224 cooled apparatus following procedures described elsewhere[41]. All data were recorded using a  
225 single-element XR-100 silicon drift detector (Amptek, Be window).

226 XRF maps were recorded at 4138 eV (100 eV above the Ca K-edge) using a beam spot  
227 size of 3  $\mu$ m x 4  $\mu$ m, 2 x 2  $\mu$ m pixel size and 70 ms dwell time/pixel. Micro-XRF spectra were  
228 recorded simultaneously on each pixel of the maps. All maps were then deadtime-corrected and  
229 decontaminated using custom LabVIEW 2018 (National Instruments, Austin, TX, USA) software  
230 available at the beamline. Maps were then processed using a custom Matlab R2020b program  
231 (MathWorks, Natick, MA, USA) available at the beamline.

## 232 233 **DNA extraction and metagenomic sequencing**

234  
235 Approximately 200  $\mu$ l of biofilm was extracted using MoBio Powersoil DNA extraction kit (MoBio  
236 Laboratories, Inc., CA, USA) according to the manufacturer's protocol, with the bead-beating time  
237 reduced to less than one minute. This DNA extract was then gel purified and quantified using a  
238 low-mass ladder (Promega). PCR was performed on ~50 ng of DNA in a reaction mixture  
239 containing 1X Takara ExTaq PCR buffer, 2 mM MgCl<sub>2</sub>, 50  $\mu$ g of non-acetylated BSA, 200  $\mu$ M  
240 dNTPs, 12.5 ng of universal bacterial 16S rRNA gene primers (27F and 1492R), 1.5 U ExTaq  
241 polymerase (Takara, Madison, Wisc.), and made to a volume of 50  $\mu$ l with sterile milliQ water.  
242 Reactions were optimized for annealing temperature over the range of 48-60°C for 25 cycles and  
243 the most intense single bands were gel purified.

244 Total genomic DNA for metagenomic sequencing (150 bp or 250 bp reads) for both biofilm  
245 and planktonic samples (20% of each filter) was extracted using MoBio PowerMax Soil DNA  
246 extraction kit. Cells were extracted from 20% of each filter by adding 15 ml of lysis buffer and  
247 vortexing for 10 minutes. Lysis of cells was modified by heating to 65°C for 30 minutes and 1 min  
248 of bead beating. DNA was eluted in milliQ water and ethanol precipitation was performed (70%  
249 EtOH, 3 M sodium acetate, incubation for 24 hours at 4 °C).

## 250 251 **Illumina sequencing, assembly, binning and sequence curation**

252  
253 Shotgun genomic reads were assembled using IDBA-UD [42]. Draft genomes consisting of  
254 scaffolds  $\geq$  1 kbp in length were binned based on a combination of GC content, coverage, single  
255 copy gene content, phylogenetic profile and patterns of organism abundance over samples. The  
256 phylogenetic profile was established using a database of isolate as well as metagenomics-derived  
257 sequences. In some cases, scaffold sequences from groups of bins were used to construct  
258 emergent self-organizing maps in which the structure was established using tetranucleotide  
259 composition (tetra-ESOMs). For scaffolds > 6 kb, scaffolds were subdivided into 3 kb segments  
260 and treated separately in the ESOM analysis. In cases where the majority of segments from the

261 same scaffold did not group together in the ESOM, the scaffolds were evaluated manually (based  
262 on gene content and other information) to resolve their placement or assign them to unbinned.  
263 The scaffold set defined based on ESOM analysis was then used to generate a draft genome bin  
264 that was again checked for consistent binning signals (as above). As ESOMs only used scaffolds  
265 >3 kb in length, scaffolds from the original bins were added if they had a tightly defined GC,  
266 coverage and the expected phylogenetic profile. CheckM [43] was used for estimation of genome  
267 completeness, strain heterogeneity and contamination. Curated genomes with less than 5  
268 duplicated single-copy genes (some of which occur because genes are split at scaffold ends) and  
269 with  $\geq 95\%$  of the expected single copy marker gene set used for completeness estimation (50  
270 for CPR, 51 for other bacteria) were classified as near-complete,  $\geq 70\%$  and  $< 90\%$  complete as  
271 drafts and those  $< 70\%$  complete as partial. Genomes with  $>5$  duplicated single-copy genes were  
272 classified as partial, regardless of other indicators of bin completeness. Candidate phage contigs  
273 were identified based on their lack of consistent phylogenetic profile and the presence of proteins  
274 with homology to those of known phages. Those with similar characteristics, and typical plasmid  
275 genes, but lacking typical phage structural genes were labeled as plasmids. Manually curated  
276 phages were classified using Virsorter2[44]. Other viral sequences were profiled using Virsorter2,  
277 evaluated by checkV [45] and annotated using DRAMv [46] with default parameters.

278

### 279 **Phylogenetic analyses**

280

281 The concatenated ribosomal protein tree was generated using 16 syntenic genes that have been  
282 shown to undergo limited lateral gene transfer (rpL2, 3, 4, 5, 6, 14, 15, 16, 18, 22, 24 and rpS3,  
283 8, 10, 17, 19) [47]. We obtained branch support with the ultrafast bootstrap [48] implemented in  
284 iQ-TREE v1.6.12 [49] with the following parameters: -bb 1000 -m LG+F+G4. Trees were  
285 visualized using iTOL v6.3.2 [50]. Amino acid alignments of the individual ribosomal proteins were  
286 generated using MAFFT v7.304 [51] and trimmed using trimAL [52] with the following setting: -gt  
287 0.1.

288 To verify the presence of biogeochemically-relevant genes, phylogenetic trees were  
289 constructed. We used markers for sulfur (DsrAB, Pdo), carbon metabolism (RuBisCO) and energy  
290 conservation ([NiFe]-hydrogenases). Sequences were obtained using GOOSOS and aligned  
291 using MAFFT v7.304. The phylogeny for DsrAB was generated using FastTree 2.1.11 SSE3 [53].  
292 All other phylogenies were generated using iQ-TREE v.1.6.12 using the ultrafast bootstrap and  
293 parameters specified previously.

294 Hydrogenase sequences from Alum Rock genomes were obtained using HMMs from [54].  
295 Phylogenetic classification was performed using reference sequences obtained from [54] and  
296 using HydDB [55]. Verification of hydrogenase loci was performed via inspection of nearby genes  
297 and the presence of required hydrogenase accessory genes. Genome context diagrams were  
298 generated using Clinker[56].

299

### 300 **Metagenomics metabolic pathways analysis**

301

302 Preliminary functional annotations were established and collections of metabolic capacities in  
303 genome bins were overviewed using ggKbase tools [57]. In addition, metabolic profiling was done  
304 by mapping ORFs to KEGG ortholog groups (KOs) using an HMM database that was compiled  
305 as previously described[58]. This HMM database was used to scan the metagenomic bins, and  
306 ORFs were assigned the KO of the best-scoring HMM, providing it was above the noise threshold.  
307 In addition, we profiled metabolic capacities with KEGG functional annotation using  
308 METABOLIC[59].

309

### 310 **Protein structure prediction**

311

312 Protein structures were predicted for the putative complexes of the nitrate reductase (Nrx),  
313 dioxygenase/rhodonase, and group 3b [NiFe]-hydrogenase using AlphaFold2 in multimer mode.  
314 In all cases, the average per residue confidence scores (pLDDT) exceeded 90, a level that is  
315 empirically shown to produce highly accurate local structural models. The best-scoring models  
316 were aligned to related protein complexes in PyMol. Group 3b [NiFe]-hydrogenase complexes  
317 were predicted using AlphaFold2 in multimer mode for the HyhL (hydrogenase large subunit),  
318 HyhS (hydrogenase small subunit), HyhG (diaphorase catalytic subunit) and HyhB (diaphorase  
319 electron transfer subunit)[60,61].

320

321

322

## 323 **Results**

324

### 325 **Groundwater of mixed origin hosts biofilms dominated by filamentous bacteria**

326

327 We measured the flow rate, pH, and concentrations of ionic species (**Supplementary Table S1**)  
328 in the MS4 and MS11 groundwater. The MS11 spring has higher flow rate, ionic strength,  
329 alkalinity, and sulfide levels than the MS4 spring. H and O stable isotope compositions of the  
330 waters, combined with salinity measurements, indicate that spring waters are mixtures of meteoric  
331 input and pore waters from the host Miocene Monterey Group shales and cherts, and possibly  
332 deeper Cretaceous sediments of the Great Valley Group. MS4 water is more diluted by meteoric  
333 input than MS11. Long-term monitoring of these two springs shows they experience small  
334 seasonal fluctuations in temperature and that they are generally hydrologically and geochemically  
335 stable (**Fig. 1D-F**). Water temperatures of 27-29 °C are well above the mean annual surface  
336 temperature of 15.1 °C. The salinity of the springs is 1.8 and 2.3% for MS4 and MS11,  
337 respectively. The sulfide levels (within the zone of oxygenation) range up to ~9 and 69 µmol/L at  
338 MS4 and MS11, respectively.

339

340 The biofilms at both MS4 and MS11 sites (**Fig. 1B-C**) are mainly composed of thin white  
341 streamers (~ 5-10 cm long) that are primarily attached to rocks and Scanning electron microscopy  
342 (SEM) and scanning transmission X-ray microscopy (STXM) revealed that MS4 biofilms consist  
343 of filaments and cells distributed amongst the filaments (**Fig. 2**). By contrast, the MS11 biofilm  
344 consists almost entirely of filamentous bacteria (**Fig. 2C, Fig. 3C-D, Fig. 4**).

344



## 345 **Filamentous bacteria have encapsulated elemental sulfur granules and episymbionts**

346

347 Micro-focused XRF mapping of sulfur distribution at 95 °K evidenced the presence of sulfur across  
348 MS4 biofilm filaments (**Fig. S1**). STXM sulfur maps and S L<sub>2,3</sub> NEXAFS spectra showed that these  
349 filamentous bacteria contain S<sup>0</sup> granules (average 378 ± 50 nm diameter, as estimated on 76  
350 granules) encapsulated in protein-rich compartments (**Fig. 2D-I**, **Fig. 3A-B**, **Fig. S2**). The width  
351 of these filaments is <1.6 μm suggesting the presence of *Thiotrix* spp. type I (ref). Rod-shaped,  
352 curved-shaped and coccoid cells were found near the filaments in MS4 biofilms (**Fig. 2**, **Fig. 3**,  
353 **Fig. S3**). C K-edge NEXAFS spectra at 87 °K of filamentous bacteria in MS11 (**Fig. 4**) exhibit a  
354 major peak at 288.2 eV corresponding to amide carbonyl groups evidencing that filaments are  
355 protein-rich (**Supplementary Table S2**). Protein maps of these filaments (**Fig. 3C**, **Fig. 4B**)  
356 suggest that sulfur granules are surrounded by proteins. The spectrum of cells exhibits a major  
357 peak at 288.2 eV (amide bonds), a peak at 285.2 eV attributed mostly to aromatic groups in  
358 proteins and a peak at 289.5 eV attributed to nucleic acids, consistent with prior studies at room  
359 temperature [41,62–64], see **Supplementary Table S2** for details. Resonances are more defined,  
360 likely due to reduced Debye-Waller thermal disorder at low temperature. Cells, filaments and  
361 extracellular polymeric substances (EPS) exhibited a shifted carbonate peak at 290.7 eV that  
362 corresponds to either organic carbonates or carbonate minerals[65], and originates mainly from  
363 dissolved carbonates and carbonate precipitates present in the groundwater at circumneutral pH  
364 (**Supplementary Tables S1, S2**). Cells and filaments both contained potassium, but not the EPS.  
365 Strikingly, ultra-small cells were found along the surfaces of the filaments in both MS4 biofilms  
366 (**Fig. 2F-G**, **Fig. 3**, **Fig. S3D**) and MS11 biofilms (**Fig. S3A**), these cells are typically about 480  
367 nm long, 250 nm wide, as estimated from STXM images. Other ultra-small cells (290 ±20 nm  
368 long, 120 ±10 nm wide) were also found in the vicinity of the filaments but not on their surfaces.

369

## 370 **Biofilms contain diverse bacteria and archaea and include CPR bacteria**

371

372 We used genome-resolved metagenomics to investigate microbial consortia, metabolisms and  
373 microbial interactions that underpin the Alum Rock communities. In total, we recovered 212 non-  
374 redundant genomic bins from the MS4 and MS11 samples (57 from MS11 and 155 from the  
375 biofilm + planktonic samples from MS4). Of these, 38 were classified as near-complete (>95%,  
376 **Supplementary Table S3**). Taxonomic affiliations of all of the bacterial genomes were  
377 established based on concatenated ribosomal protein trees (**Fig. 5A**).

378 Genomically represented groups in the biofilms and planktonic fractions from both sites  
379 include Gammaproteobacteria (Thiotrichales, Chromatiales, Beggiotales), Campylobacterota  
380 (Campylobacterales), Betaproteobacteria (including *Thiomonas*), Deltaproteobacteria  
381 (specifically Desulfobacterales), Bacteroidota, Chloroflexi, Ignavibacteria, Spirochaetes,  
382 Lentisphaerae, Riflebacteria, Verucomicrobia, Acidobacteria, Planctomycete, KSB1,  
383 Caldisericota, Planctomycetota, Edwardsbacteria, Dependientiae (TM6), and Margulisbacteria.  
384 Diverse groups of CPR are present, including Uhrbacteria (OP11), Gracilibacteria (BD1-5),  
385 Peregrinibacteria (PER), Moranbacteria (OD1), Woesebacteria (OP11), Roizmanbacteria and  
386 Gottesmanbacteria (OP11), Saccharibacteria (TM7), Falkowbacteria (OD1), Absconditabacteria  
387 (SR1), Berkelbacteria and Doudnabacteria and Dojkabacteria (WS6).

388 (see: <https://ggkbase.berkeley.edu/alumrock-genomes/organisms>).

389 To estimate the abundances of organisms in the two springs (independent of binning) we  
390 calculated the DNA read coverage of ribosomal proteins from all of the genomic bins (**Fig. S4**).  
391 The MS4 spring was dominated by *Halothiobacillales*, *Beggiatoales* and *Thiotrichales* and,  
392 Campylobacteriales based on relative abundance among genomes (**Supplementary table S4**).  
393 The most abundant species in MS4 shares genome-wide average 51% amino acid similarity with  
394 the sulfur oxidizer *Thiothrix nivea* [66]. The MS11 spring was dominated by a single *Beggiatoa* sp.  
395 (*Beggiatoa*-related\_37\_1401).

396

### 397 **Diverse bacteria are implicated in sulfur cycling**

398

399 The MS4 biofilms are estimated to be ~1.4 x as diverse as the MS11 biofilms, based on the  
400 number of phylogenetically informative marker genes detected (normalized for sequencing  
401 depth). We focused our analysis of the sulfur metabolism of MS4 bacteria for this reason, and  
402 given that we detected ultrasmall and surface-attached cells on filamentous bacteria implicated  
403 in sulfur oxidation. The most abundant organism in MS4, which is closely related to the  
404 filamentous bacterium *Thiothrix nivea*, encodes genes (*soxABC*, periplasmic thiosulfate-oxidizing  
405 ; *aprAB*, adenylylsulfate reductase; *dsrAB*, reverse dissimilatory sulfite reductase) to convert  
406 sulfide to thiosulfate, elemental sulfur and sulfate (**Fig. 5B**). The absence of *dsrD* genes indicates  
407 that the Dsr complex operates in the sulfide oxidation direction (i.e. rDsr pathway). This *Thiothrix*  
408 bacterium also lacks any *soxC* genes, which in bacterial genomes has been associated with the  
409 accumulation of sulfur granules or polysulfide [67,68]. Based on the abundance of these  
410 organisms and their likely association with sulfur granules, it is possible that *Thiothrix* are the host  
411 for the ultra-small cells.

412 MS4 contains various other bacteria capable of oxidation of sulfur compounds. A  
413 subdominant population of *Sulfurovum* bacteria encode *sqr* genes and thus likely oxidize sulfide  
414 to S<sup>0</sup>. Some *Sulfurovum* bacteria in both communities have genomes also encode *soxCDYZ*  
415 complexes, suggesting they mediate thiosulfate oxidation (potentially coupled to nitrate reduction,  
416 e.g., via *narG* and *napA*). *Sulfuricurvum* species are also relatively abundant in MS4 and encode  
417 genes for sulfur and thiosulfate oxidation, in line with culture-based studies [69]. [69]. The  
418 genomes of *Chloroflexota* encode the capacity for thiosulfate disproportionation via thiosulfate  
419 reductase / polysulfide reductase (*phsA*) and sulfide oxidation via flavocytochrome *c* sulfide  
420 dehydrogenase. Two low abundance Gammaproteobacteria species related to *Acidithiobacillus*  
421 have the capacity for thiosulfate oxidation. Several genomes from moderately abundant  
422 *Halothiobacillales* have the metabolic capacity for sulfide and thiosulfate oxidation via *fccB*, *dsrAB*  
423 and *soxBCY* respectively (**Supplementary Table S5, S6**).

424 Some bacteria from MS4 spring also potentially mediate dissimilatory sulfate reduction.  
425 Specifically, the genomes of some *Desulfobacteriales* belonging to the families of  
426 *Desulfatiglandaceae*, *Syntrophobacterales*, *Desulfurivibrionaceae* and *Desulfarculales* encode  
427 the capacity to reduce sulfate back to sulfide via Dsr genes, likely coupled to oxidation of organic  
428 carbon or H<sub>2</sub>. Some rare Desulfocapsaceae from MS4 that are related to bacteria of the genus  
429 *Desulfocapsa* have thiosulfate reductase, group Group 3b [NiFe] (Hyd; possibly  
430 sulfhydrogenase), as well as SAT and APR for the oxidation of sulfite to sulfate. Thus, it appears  
431 these bacteria are involved in sulfur disproportionation whereby S<sup>0</sup>, thiosulfate, and sulfite are  
432 converted to H<sub>2</sub>S and sulfate., as has been demonstrated in cultures of bacteria from this genus

433 [70]. Other *Desulfocapsa* spp. have tetrathionate reductase genes, suggesting they are capable  
434 of converting tetrathionate to thiosulfate. The *Desulfocapsa*-related bacteria also contain *dsrABD*  
435 genes, which fall within the reductive cluster closely related to those from *Desulfocapsa*  
436 *sulfexigens*. We infer that the *Desulfocapsa*-related bacteria are capable of S disproportionation,  
437 as reported previously [71]. This presence of *dsrD* suggests that the species in the spring is  
438 capable of sulfate reduction. Only members of the candidate phylum Riflebacteria, family  
439 Ozemobacteraceae, have the capacity of anaerobic sulfate reduction via anaerobic sulfite  
440 reductase system (*asrABC*). A bacterium from a new class of *Caldithrix* from the MS4 spring is  
441 predicted to perform sulfur oxidation via dissimilatory sulfite reductase, sulfite oxidation, sulfate  
442 reduction and thiosulfate disproportionation (**Supplementary Table S5, S6**). We also identified  
443 abundant bacteria from novel families of Bacteroidetes, which generally encode thiosulfate  
444 reductase genes (*phS*) and adenylylsulfate reductase (*aprA*) involved in thiosulfate  
445 disproportionation and sulfate reduction.

446 Surprisingly, we identified persulfide dioxygenase (*sdo*) and rhodanase (thiosulfate  
447 sulfurtransferase) in genomes of *Elusimicrobia*, *Riflebacteria*, *Oscillatoriothricidae* and in a novel  
448 family of *Syntrophales* (**Fig. 6A**). These enzymes are also present in the mitochondria of plants  
449 and animals, as well as in a number of heterotrophic bacteria, where they play important roles in  
450 the detoxification of intracellular sulfide and sulfur assimilation respectively [72,73]. We also found  
451 a putative sulfur dioxygenase encoded in a Doudnabacteria genome that clusters with protein  
452 sequences of other CPR bacteria from public data. In the operon there is adjacent a sulfur  
453 transferase, suggesting its potential function in thiosulfate oxidation (**Fig. 10**). This is interesting  
454 because persulfide dioxygenase has not been linked to CPR bacteria previously. Modeling of the  
455 persulfide dioxygenase from Doudnabacterium using AlphaFold2 indicates that it has structural  
456 homology with the biochemically characterized persulfide dioxygenase (**Fig. 6B-D**). We identified  
457 these two adjacent genes in the genomes of several other CPR from high sulfide environments,  
458 including Kaiserbacteria (groundwater from California), Pacebacteria (wastewater),  
459 Moranbacteria, and Gracilibacteria (Crystal Geyser aquifer). Thus, we suggest that these genes  
460 may enable a variety of CPR bacteria to grow and generate energy from sulfur oxidation.

461 Like MS4, the most abundant microorganisms likely mediate sulfur compound oxidation,  
462 though *Beggiatoa* are the dominant species rather than *Thiothrix*. As expected, the *Beggiatoa*  
463 genome encodes a single contig that contains the *Dsr* genes (*dsrABPOJLCKMCHF*); *s dsrD*  
464 was not identified, we conclude that the *Dsr* genes are operational in a reverse *Dsr* pathway  
465 (r*Dsr*). The genome also encodes *AprAB* (adenylylsulfate reductases), and *Sat* (sulfate  
466 adenylyltransferase) for the oxidation of sulfide to sulfate, sulfide-quinone oxidoreductase (*Sqr*)  
467 as well as sulfide dehydrogenase (*fccB*) genes for the oxidation of hydrogen sulfide to S<sup>0</sup>. The  
468 genomes do not contain a complete set of sulfur-oxidizing *sox* pathway genes, but *soxDXYZ* were  
469 identified. Given the lack of *soxC*, we conclude that (like *Thiothrix*) the primary role of *Beggiatoa*  
470 in the community is the conversion of sulfide to thiosulfate, elemental sulfur and sulfate. The  
471 absence of *soxCD* in bacterial genomes has been associated with the accumulation of sulfur  
472 granules or polysulfide [67,68].

473  
474  
475

## 476 Sulfur oxidizing bacteria also contribute to nitrogen cycling

477  
478 The dominant bacteria in MS4 and MS11 are predicted to mediate nitrogen fixation and  
479 denitrification processes. In both MS4 and MS11, genes encoding nitrogenase implicated in N<sub>2</sub>  
480 fixation are widespread in Proteobacteria, including in the dominant *Thiothrix*, *Beggiatoa* and  
481 *Sulfurovum* and Verrucomicrobia. Other organisms with this capacity include other  
482 *Gammaproteobacteria*, *Chromatiales*, *Campylobacteriales*, *Sulfurovum*, *Sulfuricurvum*,  
483 *Ignavibacteria*, *Sulfosprillum*, *Spirochaetes*, *Desulfocapsa*, and potentially *Lentisphaera*.

484 The *Thiotrichales* genomes encode numerous genes for the reduction of nitrate and nitrite,  
485 although the dominant *Thiothrix* species only has the capability to reduce nitrite to nitrous oxide  
486 via *nirS* and *norBC* genes. Some *Chromatiales* bacteria in both sites also appear to be capable  
487 of dissimilatory nitrite oxidation to ammonia. The sulfur-oxidizing Campylobacteriales that occur in  
488 both MS4 and MS11 have numerous genes implicated in the reduction of nitrate (*napAB*) and  
489 nitric-oxide (*norBC*). Two low abundance *Acidithiobacillales* in MS4 that are predicted to perform  
490 thiosulfate oxidation have ammonia monooxygenase (*amoA*) genes, suggesting they may be  
491 involved in ammonia oxidation and nitrite ammonification. *Chloroflexi* that occur in both springs  
492 have the capacity for nitrite reduction via nitrite reductase (*nirK*), nitric oxide reduction (*norBC*)  
493 and nitrite ammonification. A novel *Caldithrix* species from MS4 has the potential of nitric oxide  
494 reduction via nitric oxide reductase (*norBC*) and nitrite reduction via periplasmic nitrate reductase  
495 NapA (**Fig. 5B**).

496 In addition to being the most abundant sulfur oxidizers in the MS11 spring, *Beggiatoa* are  
497 metabolically versatile with regards to nitrogen cycling. Their genomes encode genes with  
498 similarity to nitrate reductase (*narABG*), nitrite reductase (*nirS*), nitric oxide reductase (*norBC*),  
499 and nitrous-oxide reductase (*nosZ*) for the complete reduction of nitrate to N<sub>2</sub>. They also contain  
500 *nrfA* potentially for dissimilatory nitrite reduction to ammonia (DNRA) or nitrite ammonification.  
501 Thus, although these bacteria can grow aerobically, they also can likely couple sulfur oxidation to  
502 nitrate reduction, in line with previous studies.

503

504

505

## 506 Extensive links between hydrogen and sulfur metabolism

507

508 To gain insight into the role of hydrogen metabolism in the Alum Rock springs, we analyzed the  
509 distribution of hydrogenases and associated enzymes in the genomes. There was considerable  
510 capacity for fermentative H<sub>2</sub> production using nicotinamides (via group 3b and 3d [NiFe]-  
511 hydrogenases), ferredoxin (via group A [FeFe]-hydrogenases and group 4 [NiFe]-hydrogenases),  
512 and formate (via formate hydrogenases) as electron donors (**Fig. 7A**). Some putative H<sub>2</sub>  
513 producers are likely to be metabolically flexible bacteria such as *Sulfurospirillum* and  
514 Flavobacteriales, which switch to fermentation when limited for respiratory electron acceptors  
515 based on previous reports [55,74], CPR bacteria, TA06, and Spirochaetes with group 3b and 3d  
516 [NiFe]-hydrogenases are likely to be obligate fermenters given they apparently lack terminal  
517 reductases (**Supplementary Table S7**). The gene arrangements of the group 3b [NiFe]-  
518 hydrogenases in the genomes of the CPR bacteria *Berkelbacteria* and *Moranbacteria* (**Fig. 7B**)  
519 are similar to the biochemically characterized hydrogenase and sulfhydrogenase of *Pyrococcus*

520 *furiosus* [75] and those previously reported in other CPR bacteria[25,76], suggesting that these  
521 hydrogenases may be capable of reversible oxidation of hydrogen or the reduction of sulfur  
522 compounds like polysulfide. We modeled the complex from *Berkelbacteria* genome using  
523 AlphaFold and the model suggests a hydrogenase module ( $\alpha$  and  $\gamma$  subunits) with an electron  
524 wire of FeS clusters connecting to a nucleotide reducing module ( $\beta$  subunit) (**Fig. 7C**). The  $\delta$   
525 subunit has no close structural analogues but contains an additional FeS cluster and may  
526 accommodate an additional electron-accepting partner (**Fig. 7D**). Based on this structural analysis  
527 there are two separate paths for the electrons suggesting this 3b [NiFe]-hydrogenase complex is  
528 potentially an electron-bifurcating hydrogenase.

529  
530 Numerous bacteria in the Alum Rock springs are predicted to consume  $H_2$  for energy  
531 generation. Most of these hydrogenotrophs are predicted to use  $H_2$  to reduce sulfate (via group  
532 1b and 1c [NiFe]-hydrogenases; primarily Deltaproteobacteria), elemental sulfur (via group 1e  
533 [NiFe]-hydrogenases; primarily Gammaproteobacteria), or heterodisulfides (via group 3c [NiFe]-  
534 hydrogenases; various lineages including Acidobacteria). The most abundant  
535 Gammaproteobacteria and Campylobacteria likely oxidize both  $H_2$  and sulfur compounds either  
536 mixotrophically or alternatively autotrophically. The hydrogenase repertoire of these organisms  
537 includes the oxygen-tolerant group 1b and 1d [NiFe]-hydrogenases [77,78].

538  
539

#### 540 **Organic carbon cycling and fermentation**

541  
542 The ability to fix inorganic carbon ( $CO_2$ ) is a common predicted capacity for bacteria from both  
543 sites (**Supplementary Table S5, S6**). The dominant *Thiothrix*, *Beggiatoa*, and *Chromatiales*-  
544 related bacteria have type II RuBisCO genes that function in the Calvin-Benson-Bassham (CBB)  
545 cycle (**Fig. S6**). One Absconditabacteria genome has a RuBisCO that phylogenetic analysis  
546 places within the form II/III CPR clade, as reported previously [25,79]; these enzymes are inferred  
547 to function in a nucleoside salvage pathway in which  $CO_2$  is added to ribulose-1,5-bisphosphate  
548 to form 3-phosphoglycerate [80]. *Elusimicrobia* and *Campylobacterota*, including species related  
549 to Sulfurimonadaceae, have ATP citrate lyase genes that encode the key enzyme for  $CO_2$  fixation  
550 via the reverse TCA (rTCA) cycle. We also identified rTCA genes in a novel *Bacteroidetes*  
551 organism (**Supplementary Table S5, S6**). Genes of the Wood Ljungdahl carbon fixation pathway  
552 (*cooS/acsA*, *acsB* and *acsE*) were widespread in both springs, including in members of the  
553 Bacteroidetes, Desulfocapsa, Lentisphaerae, Chloroflexi, and Aminicenantia with the potential of  
554 oxidation of small organic compounds.

555 To infer polymer biomass degradation capacity of the biofilm organisms, we used marker  
556 genes involved in carbohydrate metabolism. Many bacteria in both springs have the capacity of  
557 hydrolyzing complex organic molecules to produce a variety of electron donors such as acetate,  
558 hydrogen and lactate (**Fig. 8A**). Of the organisms in the community, *Bacteroidetes* and  
559 Ignavibacteria contain the most glycosyl-hydrolase genes and thus they likely play important roles  
560 in polysaccharide degradation. Notably, one *Bacteroidetes* from MS11 has 66 glycoside  
561 hydrolase genes. This organism is the only bacterium that appears to be capable of degrading  
562 cellulose, hemicellulose, polysaccharides, and monosaccharides. *Gammaproteobacteria*,  
563 *Spirochaetes*, *Bacilli*, *Lentisphaerae* also contain genes for the degradation of a variety of

564 complex carbohydrates, but these genes are at relatively low abundance in the sulfur-oxidizing  
565 *Proteobacteria*. Similarly, many bacteria other than the sulfur-oxidizing *Proteobacteria* (and CPR)  
566 have indications of the capacity for beta-oxidation pathway of saturated fatty acids to acetyl-CoA.  
567 Many of the CPR bacteria have a few glycosyl hydrolase genes, which is significant given the  
568 scarce indications of other metabolic capacities in these organisms. Methane oxidation is  
569 predicted to be a capacity of members of Verrucomicrobia, specifically members of the  
570 Methylacidiphilales. This reaction involves particulate methane monooxygenase (pMMO-ABC),  
571 the genes for which were identified and classified phylogenetically.

572 One of the more interesting organisms present in the MS4 spring is a Gracilibacteria,  
573 which is predicted to have minimal metabolic capacities beyond glycolysis, production of  
574 peptidoglycan and generation of formate, some of which may be exported for use by other  
575 community members. Other capacities predicted for this bacterium are production of riboflavin,  
576 amino-sugars, RNA degradation, 1C by folate, interconversion of purines and pyrimidines and  
577 biosynthesis of a few amino acids.

578

### 579 **Phages may contribute auxiliary metabolic genes**

580

581 We genomically sampled 36 dsDNAv phages (**Supplementary Figure S7**) (28 from MS4 and  
582 8 from MS11) to and one nucleocytoplasmic large DNA phage. These phages have genes  
583 potentially involved in translation (bacterial ribosome L7/L12 and ribosomal protein S1), nitrogen  
584 utilization, carbon metabolism, iron metabolism (ferritin), and nucleotide metabolism (pyrimidine  
585 deoxyribonucleotide and adenine ribonucleotide biosynthesis) and defense systems such as  
586 CRISPR-Cas and TROVE (Telomerase, Ro and Vault module).

587

588

### 589 **Discussion**

590

591 Some springs are hotspots where resources associated with deeply sourced water can sustain  
592 chemoautotrophic ecosystems independent of sunlight. We studied two closely spaced but  
593 distinct sites that discharge a mixture of deeply sourced and shallow groundwater, providing  
594 microorganisms with both reduced compounds and access to oxygen. Our research integrated  
595 geochemical, X-ray spectromicroscopy, and genome-resolved metagenomic data to resolve the  
596 network of microorganisms that define the ecosystems. This approach provided insights into  
597 organism associations, including those that involve CPR bacteria, and the biogeochemical  
598 processes that sustain autotrophic ecosystems in the context of their spring-based hydrological  
599 setting.

600 Analysis of the metabolisms of the dominant bacteria in the springs revealed that genes  
601 implicated in sulfur cycling are common at both sites (**Fig. 8B**). As expected, the main energy  
602 source is reduced sulfur in the form of sulfide. Overall, the most common sulfur metabolisms are  
603 sulfide oxidation, thiosulfate disproportionation, sulfur oxidation, and less commonly sulfite  
604 oxidation and sulfate reduction. Sulfide can be oxidized aerobically and in some cases  
605 anaerobically, coupled with nitrate reduction. The genomic analyses suggest that intermediate  
606 sulfur compounds, as well as sulfate and sulfide, are actively cycled by Campylobacterota  
607 (*Sulfurovum*, *Thiovulum*), Gammaproteobacteria (*Thiotrichales* and *Beggiotales*) in the spring

608 communities, probably coupled to nitrogen compound reduction in some microhabitats. Partly  
609 oxidized sulfur in the form of elemental sulfur likely serves as an energy source that is stored as  
610 sulfur granules. Interestingly, elemental sulfur-bearing granules within filamentous cell  
611 compartments of *Beggiatoa* and/or *Thiothrix* likely serve as an energy source for the growth of  
612 these bacteria. The sulfur oxidizers are the primary source of fixed carbon and nitrogen.

613 A higher flow rate and a higher concentration of sulfate was observed at MS11 compared  
614 to MS4, and the communities have distinct microbial characteristics (**Supplementary Figure S3**).  
615 The MS4 ecosystem is highly diverse and dominated by abundant sulfide-oxidizing  
616 Gammaproteobacteria (*Thiothrix*, *Sulfurovum*) and sulfate-reducing Desulfobacteriales. The  
617 MS11 spring has relatively low diversity and is highly dominated by Campylobacterota  
618 (*Sulfurovum*, *Thiovulum*) and Gammaproteobacteria (*Thiotrichales* and *Beggiotales*). Our findings  
619 are consistent with predictions from studies that indicate that filamentous Campylobacterota  
620 dominate biofilms with high sulfide/oxygen (>150) ratios whereas Gammaproteobacteria  
621 (*Beggiatoa*-like) prefer lower (<75) ratios[9].

622 We focused some analyses on the diverse CPR bacteria within these communities, as  
623 their roles in sulfur-based chemoautotrophic ecosystems remain poorly known. CPR bacteria are  
624 characterized by small genomes and minimal anaerobic fermentative metabolism[81], however  
625 recent studies have shown auxiliary metabolisms such as the presence of hydrogenases[25,76],  
626 rhodopsin[82], nitrite reductases[83] and F-type ATPase[84], that may contribute to alternative  
627 energy conservation and adaptations to different environments and host associations. Notably,  
628 we identified genes potentially involved in elemental sulfur reduction (Sulphydrogenase) and  
629 thiosulfate oxidation (persulfide dioxygenase and rhodonase) in genomes of some CPR bacteria,  
630 suggesting a potential new energy generation mechanism for these bacteria. We found that other  
631 CPR from high sulfur environments have the same predicted potential for thiosulfate oxidation,  
632 suggesting an important general adaptation of CPR bacteria in sulfur-rich environments.

633 Perhaps the most interesting aspect of the current study regards interactions involving  
634 CPR bacteria and their host microorganisms. CPR-host associations have rarely been  
635 documented, with the exception of oral microbiome-associated Saccharibacteria (TM7) [29,85]  
636 and Actinobacteria. For this association, laboratory studies[86] have validated genomic  
637 predictions of metabolic interdependency[76]. One study imaged the CPR cells on the surfaces  
638 of their Actinobacteria hosts via SEM and showed them to be rod-shaped and < 0.2  $\mu\text{m}$  in  
639 diameter and  $\sim 0.5 \mu\text{m}$  in length[87]. Another study linked *Vampirococcus* with anoxygenic  
640 photosynthetic Gammaproteobacteria[88]. Two studies suggest links between Parcubacteria and  
641 archaea, in one case *Methanosaeta*[89] and *Methanothrix*[89]. In the case of the Neelsonbacteria  
642 CPR associated with *Methanosaeta*, cryo-TEM images indicate that the cells are  $\sim 0.5 \mu\text{m}$  in  
643 diameter. Other cultivation-independent studies have verified that CPR cells are ultra-small, so  
644 can be enriched via filtration through a 0.2  $\mu\text{m}$  filter[81]. Cryo-TEM images and tomographic  
645 analyses have documented ultra-small cells in direct association of CPR cells and host  
646 bacteria[31,81]. Generally, these data indicate that CPR cells are a fraction of a micron in length  
647 and diameter, consistent with the size for filament-associated ultra-small cells reported here  
648 ( $\sim 600 \text{ nm}$  long,  $\sim 200 \text{ nm}$  width). Thus, we conclude that the ultra-small cells imaged in the MS4  
649 biofilm are CPR bacteria.

650 Here, STXM imaging and NEXAFS spectroscopy of MS4 biofilms revealed the putative  
651 CPR bacterial cells occur in close proximity to filamentous cells with large sulfur granules. We

652 infer that these filamentous cells are probably *Thiothrix*, given that they appear to be the only  
653 abundant filamentous bacteria in this sample and that they have the genomic capacity for sulfur-  
654 oxidation, including the capacity to produce elemental sulfur. Given the combination of imaging  
655 and genomic information, we predict that certain CPR cells are episymbionts of filamentous sulfur-  
656 oxidizing *Thiothrix*. Likely CPR identifications include Gracilibacteria, Berkelbacteria,  
657 Moranbacteria or Doudnabacteria, based on microbial community abundance information. Co-  
658 cultivation of *Thiothrix* and their episymbionts is needed to identify the CPR types, and to better  
659 understand the nature of their association (e.g., mutualistic, parasitic). Although only based on *in*  
660 *vitro* data from *Pyrococcus*[75,90], the prediction that some CPR bacteria have the capacity to  
661 produce H<sub>2</sub>S raises the possibility that these episymbionts are involved in cryptic sulfur cycling  
662 that involves sulfur-oxidizing bacteria. If so, it seems plausible that Berkelbacteria or  
663 Moranbacteria, which may be able to produce H<sub>2</sub>S, are the CPR episymbionts that were imaged  
664 in this study.

665 Hydrogen is an important resource in many environments[91], yet little is known about  
666 the distribution and importance of hydrogenases in sustaining groundwater microbiomes. The  
667 most common chemolithoautotrophs in the Alum Rock spring biofilms are H<sub>2</sub>-oxidizing bacteria,  
668 which use H<sub>2</sub> as an energy source via the enzyme hydrogenase. Specifically, group 3b [NiFe]-  
669 hydrogenases are widely distributed in the genomes of many of the microbial community  
670 members. These complexes may mediate hydrogen metabolism or the direct hydrogenation of  
671 elemental sulfur to hydrogen sulfide [90]. Other hydrogenases of the microbial community  
672 members are implicated in hydrogen production and oxidation. Together, these findings suggest  
673 that most bacteria in Alum Rock springs cycle hydrogen gas and sulfur compounds, reactions that  
674 underpin the biology and geochemistry of this ecosystem.

675  
676  
677  
678  
679  
680  
681  
682  
683  
684  
685  
686  
687  
688  
689  
690  
691  
692  
693  
694  
695



## 696 **ADDITIONAL INFORMATION AND DECLARATIONS**

697

### 698 **Funding**

699

700 We gratefully acknowledge the Innovative Genomics Institute and sequencing resources. This  
701 work was partly supported by a NASA Astrobiology Institute, a DOE Carbon Cycle/Kbase grant  
702 and a Sloan fellowship in Ocean Science to BJB. This research used resources of the Advanced  
703 Light Source, a U.S. DOE Office of Science User Facility under contract no. DE-AC02-  
704 05CH11231. This work was supported by NIH grants 1R01GM12763 and RM1HG009490 to  
705 D.F.S. Hydrogeological sampling and analysis was supported by NSF grants 0909701, 1344424,  
706 1724986, and 2116573 to MM. Chan Zuckerberg Biohub and the Innovative Genomics Institute  
707 to JFB. This research used resources of the Advanced Light Source, a U.S. DOE Office of Science  
708 User Facility under contract no. DE-AC02-05CH11231.

709

### 710 **Competing Interests**

711 JFB is a co-founder of Metagenomi.

712 **Author contributions:** **L.E.V-A** was involved in metagenome sample preparation, genomic and  
713 metabolic reconstruction, phylogenetic and protein structure analyses, data integration and  
714 writing of the paper. **S.C.F** was involved in STXM and X-ray fluorescence microprobe sample  
715 preparation and data analysis, data integration and writing the paper. **C.G.** contributed to the  
716 hydrogenases analyses and writing the paper. **A. J. P.** contributed to analyses of the genomic  
717 data. **A.L.J.** contributed to analyses of the CPR metabolism. **J.W-R.** contributed to phylogenetic  
718 analyses. **M.M.** helped conceive the study, collected water samples and measurements, and  
719 analyzed the geochemical data. **J.R.** collected the geochemical data. **L.M.O.** contributed to  
720 protein structure modeling and analyses **B.J.B.** contributed to phylogenetic and metabolic  
721 reconstruction and analyses. **D.F.S.** contributed financial support. **J.F.B.** conceived the study,  
722 was involved in writing the paper and analyses of the genomic data.

723

### 724 **Code and data availability**

725 The Alum Rock genomes and raw sequencing reads for this study will be made available under  
726 NCBI BioProject number XXXX. The genomes presented in this manuscript are also made  
727 available at <https://ggkbase.berkeley.edu/alumrock-genomes>

728

### 729 **Acknowledgments:**

730

731 We thank Christine He, Raphaël Méheust, Susan Mullen, Ben Rubin, Jordan Hoff, Lily Law and  
732 Haridha Shivram for their assistance with one sampling trip. Rohan Sachdeva, Shufei Lei, Alex  
733 Crits-Christoph, Adair Borges for helpful discussions, and comments on the manuscript. We thank  
734 Tolek Tyliczszak for help with the STXM cryostage. We thank Alum Rock Park for granting  
735 sampling permits.

736

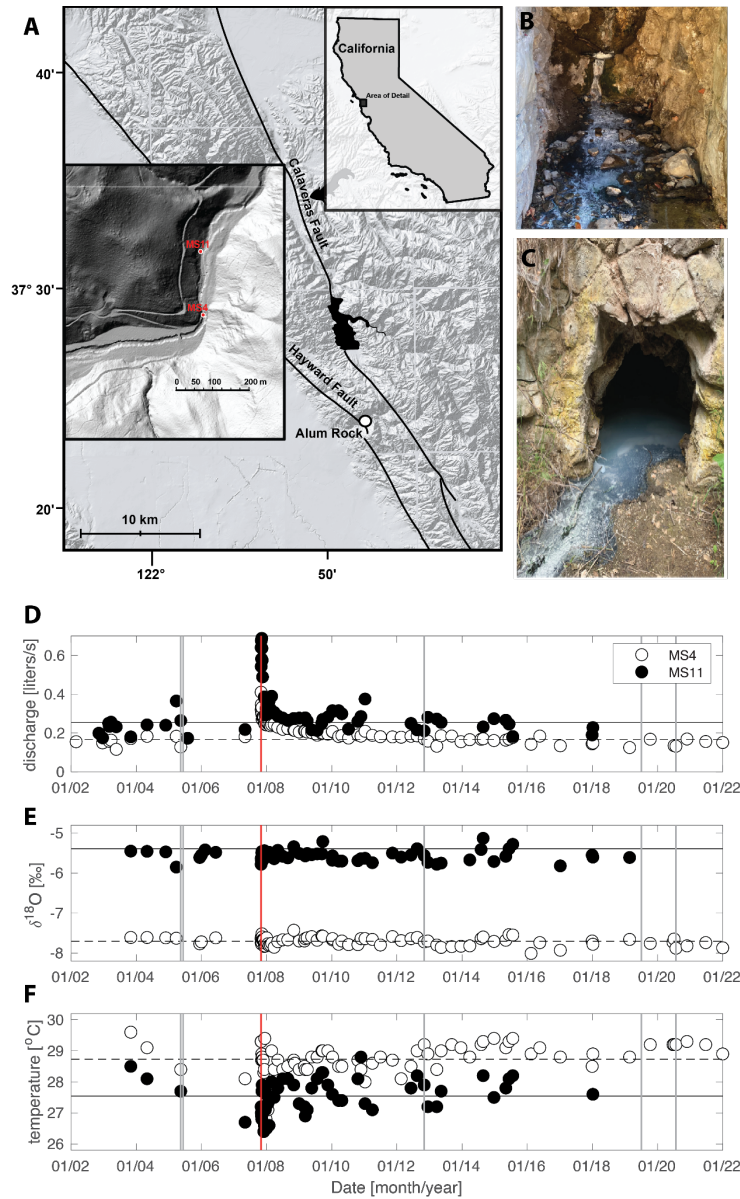

737  
738

739 **Figure 1** A) Shaded relief map showing the location of Alum Rock springs, CA, USA. Insets show  
740 the location of Alum Rock and of the MS4 and MS11 springs. Photographs of B) MS4 and C)  
741 MS11 biofilms. Thin white streamers (5-10 cm) are mostly found attached to the surfaces of rocks.  
742 Hydrogeological properties D) Discharge E)  $\delta^{18}\text{O}$ , and F) Temperature are steady over periods  
743 greater than a decade, except following large regional earthquakes. A discharge increase in late  
744 2007 followed a magnitude 5.6 earthquake with an epicenter 4 km from the springs (vertical red  
745 line), neither  $\delta^{18}\text{O}$  nor the temperature changed indicating that fluid sources did not change. The  
746 horizontal lines show averages of plotted quantities over the entire sampling period, except  
747 discharge for which the average excludes the first two years after the earthquake. Vertical grey  
748 lines show dates of biofilm and planktonic sampling.

749

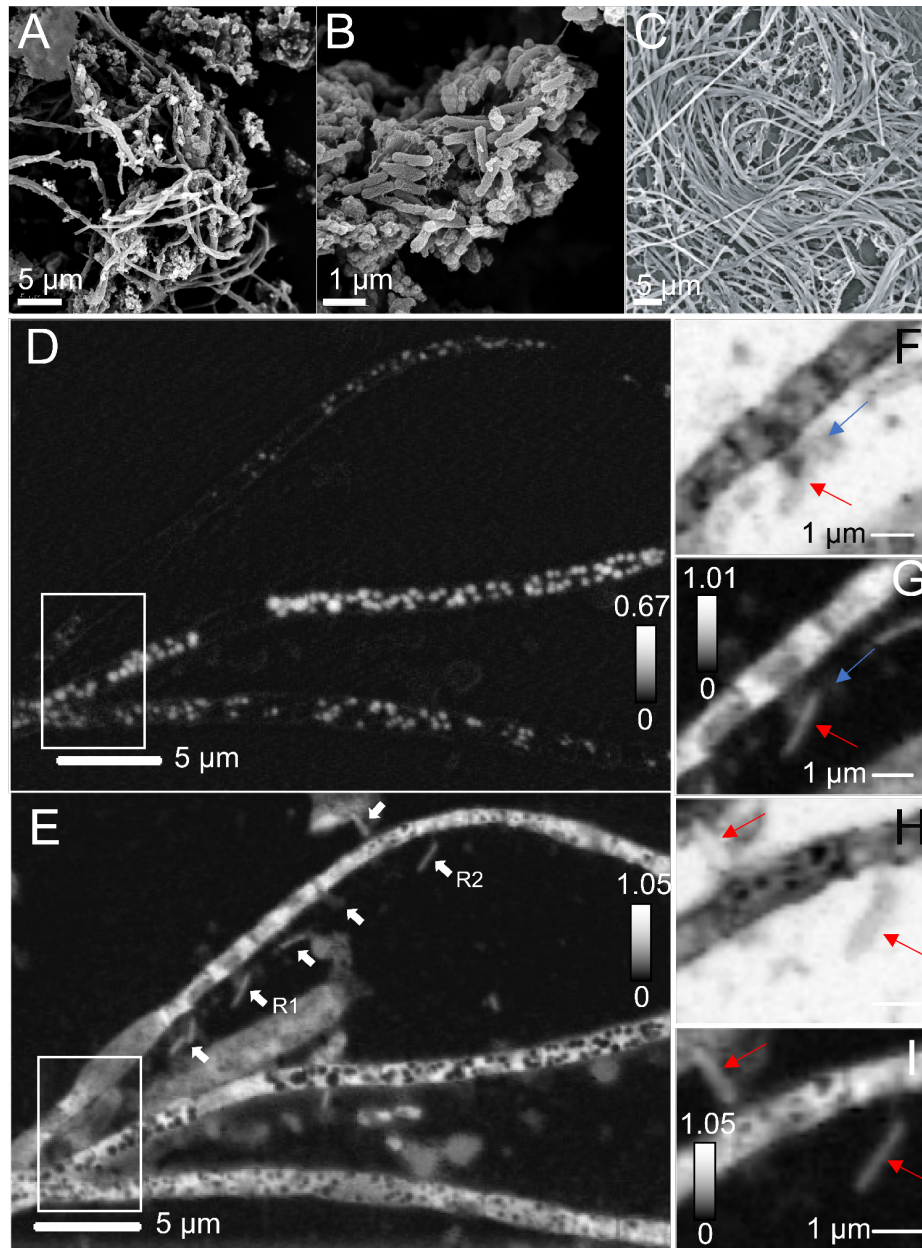

750  
751  
752  
753  
754  
755  
756  
757  
758  
759  
760  
761  
762

**Figure 2 Microscopic characterization of the biofilms.** A), B) Scanning electron micrographs of MS4 and C) MS11 biofilms. Scanning transmission x-ray microscopy of MS4 biofilms. D) Distribution map of S<sup>0</sup> suggesting the presence of sulfur granules ( $378 \pm 50$  nm in diameter) within the compartments of the filaments. The width of top, middle and bottom filaments are  $1.23 \pm 0.48$  μm,  $1.01 \pm 0.19$  μm and  $1.33 \pm 0.3$  μm respectively. E) Corresponding carbon map. White arrows point to cells. F) An ultra-small cell ( $476 \pm 36$  nm long,  $246 \pm 22$  nm, blue arrow) in contact with an apparently episymbiotic cell (red arrow), imaged at 280 eV (region R1, panel E) and corresponding G) Carbon map. H) Two apparently episymbiotic cells (red arrows) connected to filaments, imaged at 280 eV (region R2, panel E) and corresponding I) carbon map. The intensity scales correspond to the optical density.

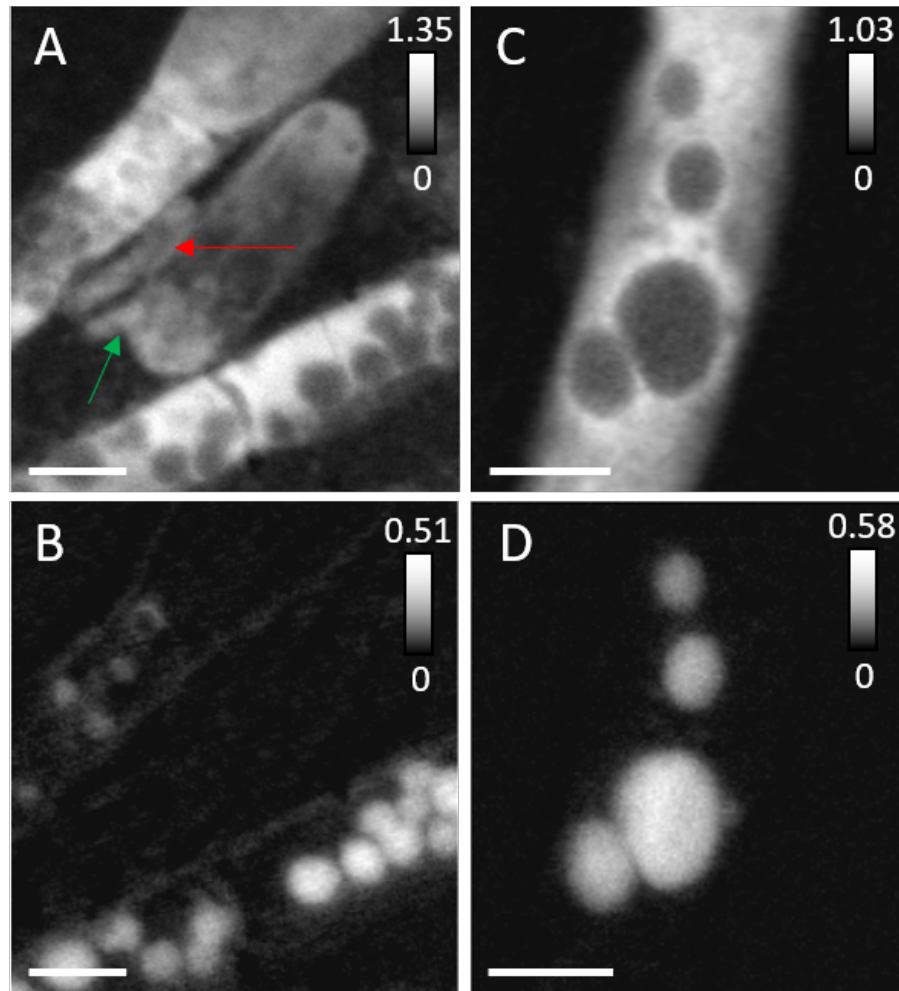

763  
764  
765  
766  
767  
768  
769  
770  
771  
772  
773  
774  
775  
776  
777

**Figure 3 Scanning transmission x-ray microscopy of MS4 and MS11 biofilms.** A) Protein map and corresponding B) Distribution map of S<sup>0</sup> in MS4 biofilms (in white boxed area, Fig. 2). Cells that are  $893 \pm 29$  nm long,  $370 \pm 20$  nm wide (red arrow),  $657 \pm 30$  nm long,  $242 \pm 32$  nm wide (green arrow), seen in close contact with filaments. C) Protein map and corresponding D) Distribution map of S<sup>0</sup> in MS11 biofilms, showing the presence of large sulfur granules ( $\sim 180$  nm to  $\sim 1.2$   $\mu$ m in diameter) in a small area of a long filament. The intensity scale corresponds to the optical density. Scale bars are 1 micron.

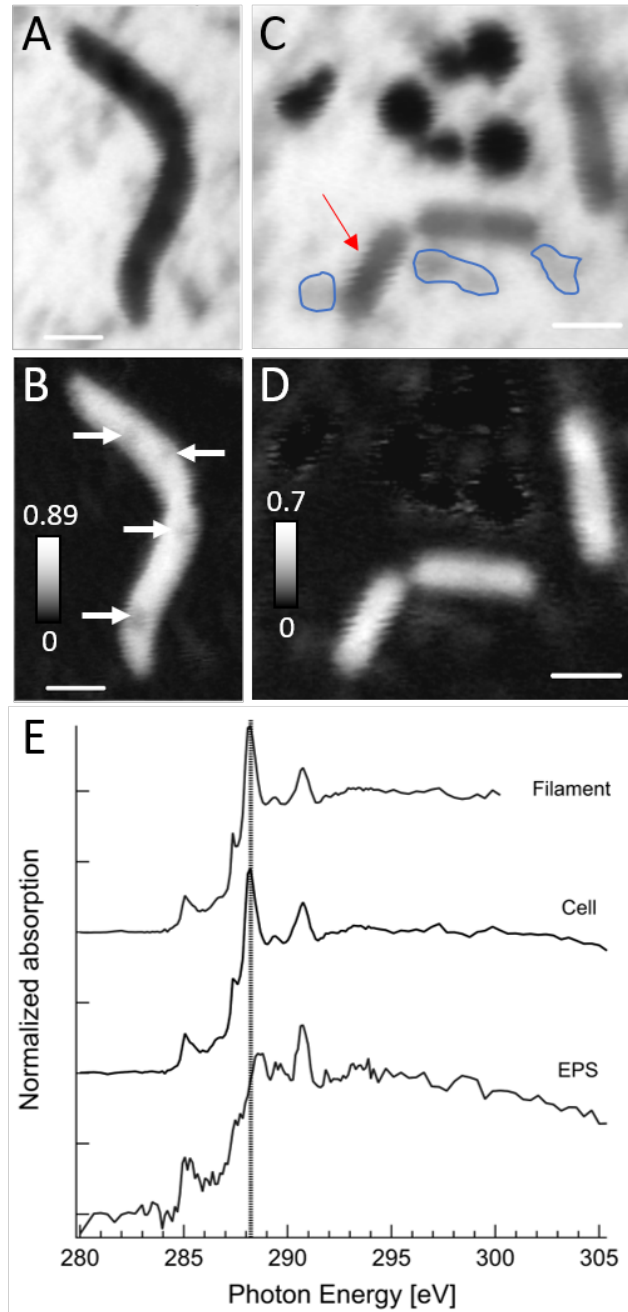

778  
779  
780  
781  
782  
783  
784  
785  
786  
787

**Figure 4 Scanning transmission x-ray microscopy at 87° Kelvin of frozen-hydrated MS11 biofilms.** A) A small filament imaged at 288.2 eV (peak of the amide carbonyl groups in proteins) and corresponding B) protein map, granules are pointed by white arrows. C) Extracellular  $S^0$  granules (~300 to 850 nm in diameter) near cells imaged at 288.2 eV and corresponding D) protein map. The intensity scale corresponds to the optical density. E) Carbon K-edge NEXAFS spectra of the filament ( $S^0$  granule-free areas), exhibiting a major peak at 288.2 eV, of a cell (red arrow) with main peak at 288.2 eV and of extracellular polymeric substances (EPS, circled in blue) exhibiting a main peak at 288.7 eV (carboxyl groups in acidic polysaccharides), see **Table S2** for details. Dashed line is at 288.2 eV. Scale bars are 1 micron.

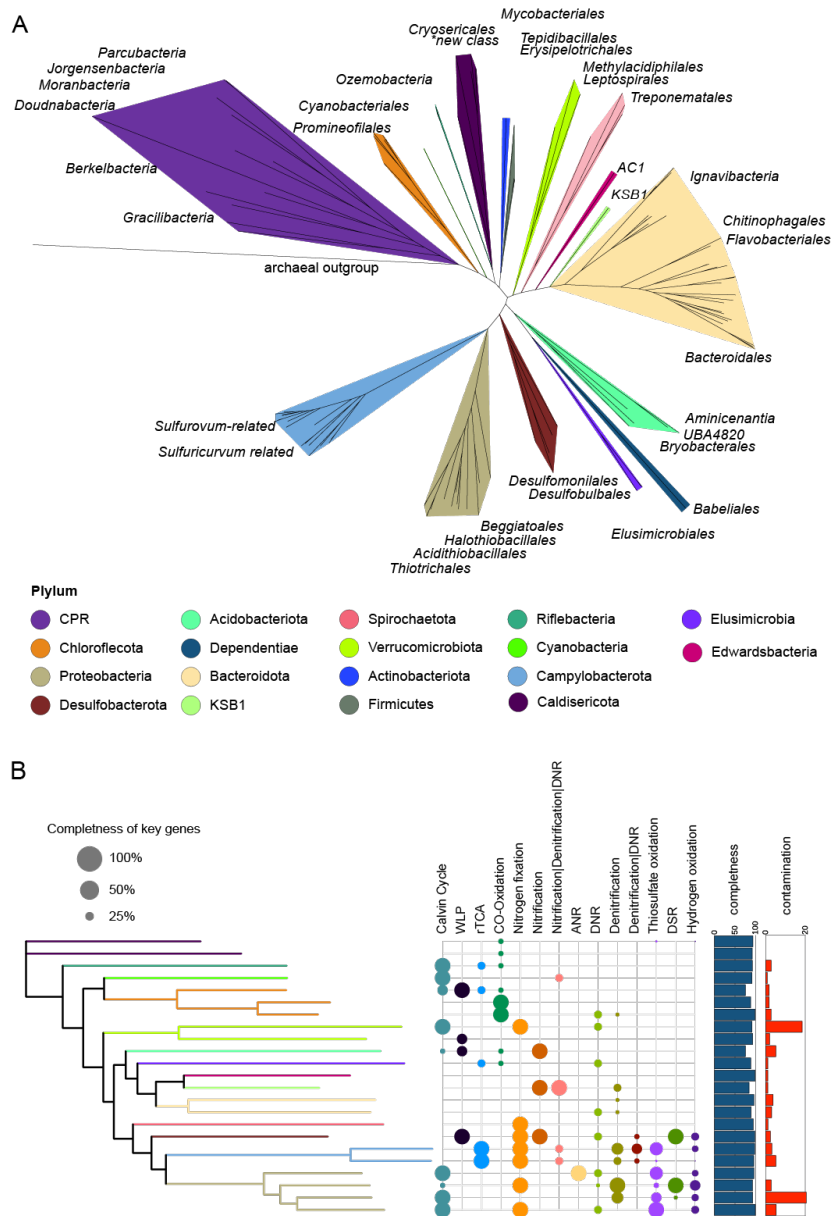

788  
 789 **Figure 5 Phylogenetic analysis and metabolism of bacteria represented by MAGs from the**  
 790 **MS4 and MS11 sites.** A) The tree is based on 16 concatenated ribosomal proteins (rpL2, 3, 4, 5,  
 791 6, 14, 15, 16, 18, 22, 24 and rpS3, 8, 10, 17, 19) generated using iQ-TREE. An archaeon,  
 792 *Thermococcus alcaliphilus*, was used as the outgroup. B) The metabolic capacities for  
 793 generalized biogeochemical pathways in Alum Rock genomes are represented by colored circles.  
 794 A pathway is present if the core KEGG orthologs encoding that pathway are identified in each  
 795 genome. Abbreviations in the metabolic capacities figure are as follows; WLP, Wood–Ljungdahl  
 796 pathway, rTCA, reductive tricarboxylic acid cycle; ANR, Assimilatory nitrate reduction; DNRA,  
 797 dissimilatory nitrate reduction to ammonia; Thiosulfate oxidation by SOX complex; DSR,  
 798 Dissimilatory sulfate reduction; Hydrogen oxidation, [NiFe] hydrogenase and NAD-reducing  
 799 hydrogenase.

800  
 801

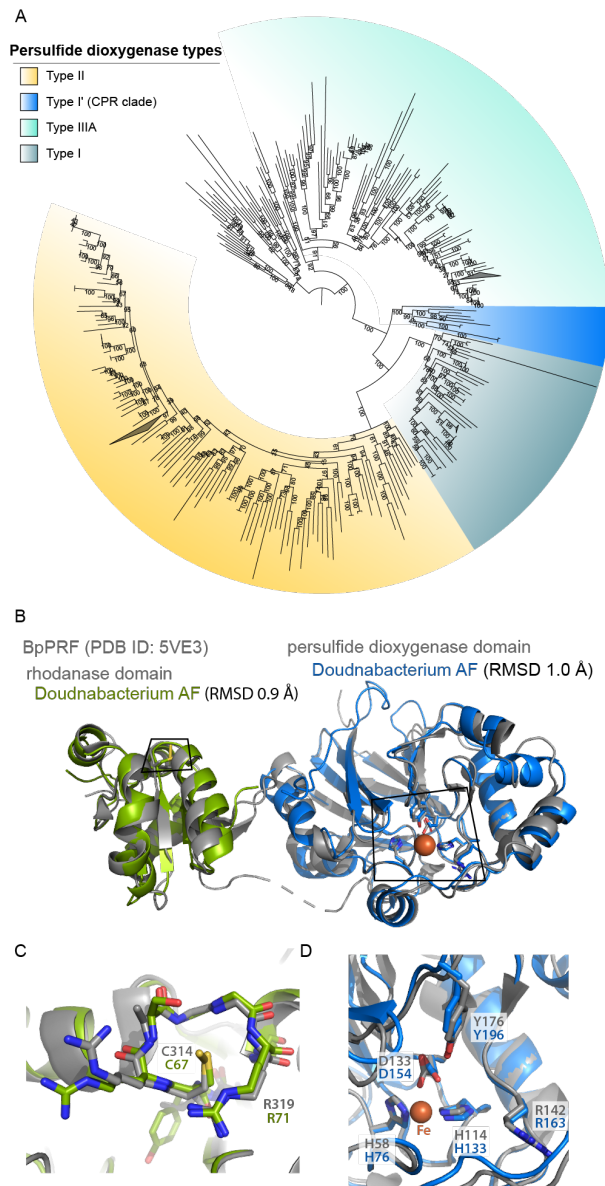

802  
803  
804  
805  
806  
807  
808  
809  
810  
811

**Figure 6 Novel Persulfide dioxygenase within CPR Bacteria.** A) Phylogenetic analyses of persulfide dioxygenase proteins from the Alum Rock genomic bins. The blue monophyletic clade shows the persulfide dioxygenase found in CPR bacteria from sulfur-rich environments. B) AlphaFold models of Doudnabacterium putative rhodanase (green) and persulfide dioxygenase (blue) aligned with the corresponding domains of the characterized natural fusion protein BpPRF (PDB ID: 5VE3). C) and D) Zoomed views of the active sites of the aligned structures reveal a strong coincidence of the key residues.

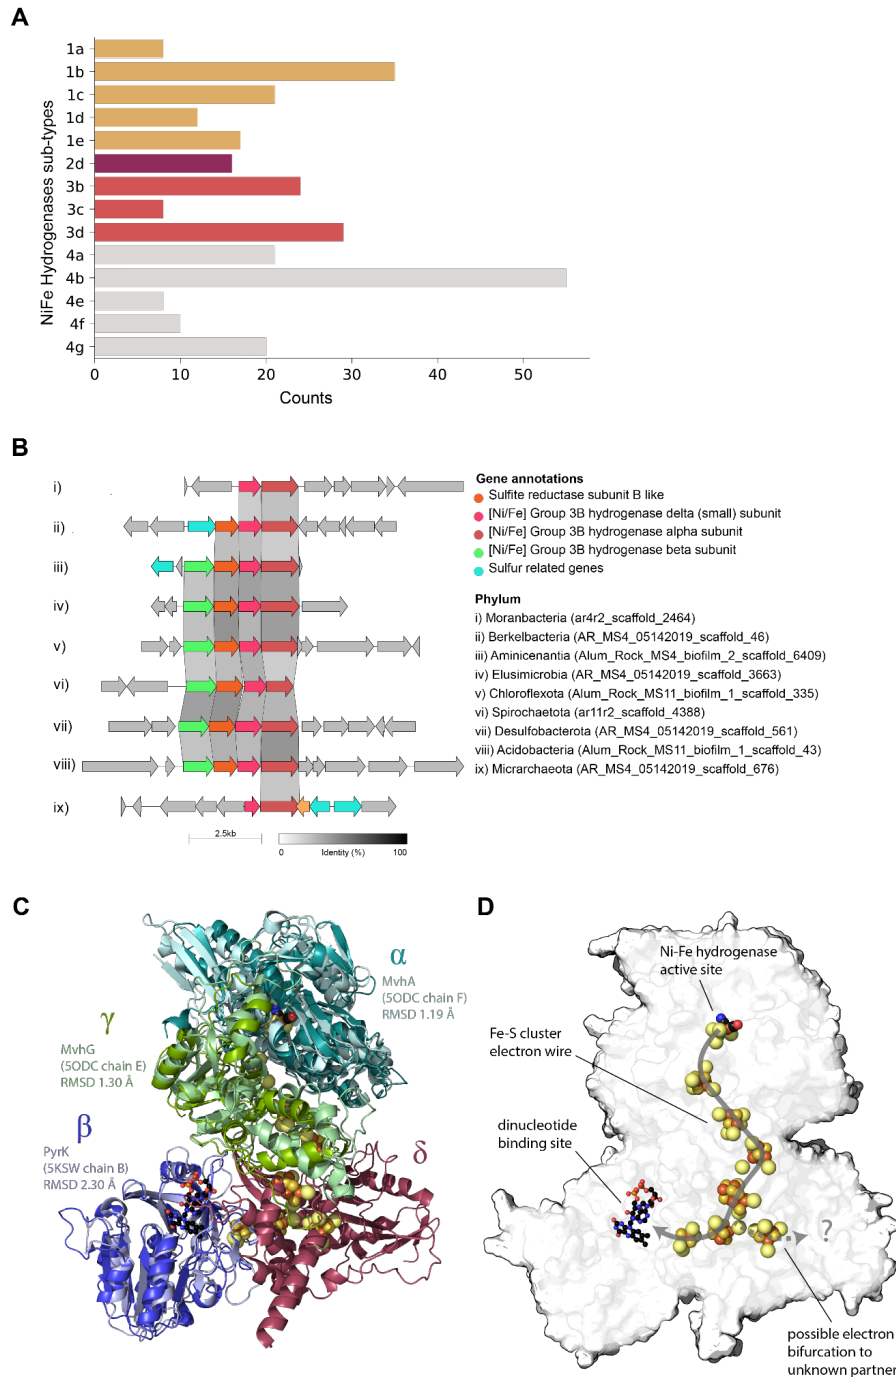

812  
 813 **Figure 7 Hydroenases distribution in Alum Rock genomes and structural insights of Group**  
 814 **3b [NiFe]-hydrogenase complex.** A) Total distribution of hydrogenases from the Alum Rock  
 815 spring. B) Genomic organization of novel Group 3b [NiFe]-hydrogenases from different organisms  
 816 present in the springs. C and D) AlphaFold multimeric model for the Berkelbacterium putative Group  
 817 3b [NiFe]-hydrogenase complex with the closest known structural matches aligned to each protein.  
 818  
 819  
 820  
 821



822

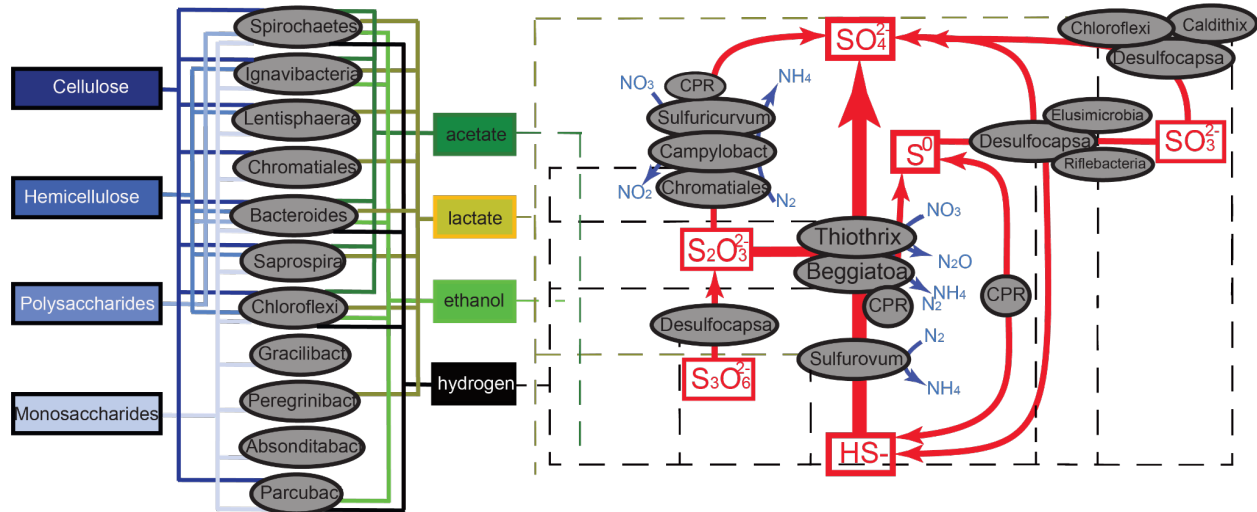

823

824

**Figure 8 Inference of partitioning of carbon, sulfur and nitrogen cycling in the Alum Rock springs.** Based on the gene content of genomes reconstructed from the springs. Arrows indicate metabolic capacities reconstructed from metagenomes recovered from the Alum Rock mineral springs. The dashed lines represent potential electron donors for anaerobic respiration processes.

825

826

827

828

829

830

831

832

833

834

835

836

837

838

839

840

841

842

843

844

845

846

847

848

849

850

851

852

853

854

855  
856  
857

## REFERENCES

- 858 1. Sheik CS, Anantharaman K, Breier JA, Sylvan JB, Edwards KJ, Dick GJ. Spatially resolved  
859 sampling reveals dynamic microbial communities in rising hydrothermal plumes across a back-  
860 arc basin. *ISME J* [Internet]. 2015;9:1434–45. Available from:  
861 <http://dx.doi.org/10.1038/ismej.2014.228>
- 862 2. Anantharaman K, Brown CT, Hug LA, Sharon I, Castelle CJ, Probst AJ, et al. Thousands of  
863 microbial genomes shed light on interconnected biogeochemical processes in an aquifer  
864 system. *Nat Commun* [Internet]. 2016;7:13219. Available from:  
865 <http://dx.doi.org/10.1038/ncomms13219>
- 866 3. Kalanetra KM, Huston SL, Nelson DC. Novel, attached, sulfur-oxidizing bacteria at shallow  
867 hydrothermal vents possess vacuoles not involved in respiratory nitrate accumulation. *Appl*  
868 *Environ Microbiol* [Internet]. 2004;70:7487–96. Available from:  
869 <http://dx.doi.org/10.1128/AEM.70.12.7487-7496.2004>
- 870 4. Takai K, Campbell BJ, Cary SC, Suzuki M, Oida H, Nunoura T, et al. Enzymatic and genetic  
871 characterization of carbon and energy metabolisms by deep-sea hydrothermal  
872 chemolithoautotrophic isolates of Epsilonproteobacteria. *Appl Environ Microbiol* [Internet].  
873 2005;71:7310–20. Available from: <http://dx.doi.org/10.1128/AEM.71.11.7310-7320.2005>
- 874 5. Yakushev EV, Pollehne F, Jost G, Kuznetsov I, Schneider B, Umlauf L. Analysis of the water  
875 column oxic/anoxic interface in the Black and Baltic seas with a numerical model. *Mar Chem*  
876 [Internet]. 2007;107:388–410. Available from:  
877 <https://www.sciencedirect.com/science/article/pii/S0304420307001314>
- 878 6. Grote J, Schott T, Bruckner CG, Glöckner FO, Jost G, Teeling H, et al. Genome and  
879 physiology of a model Epsilonproteobacterium responsible for sulfide detoxification in marine  
880 oxygen depletion zones. *Proc Natl Acad Sci U S A* [Internet]. 2012;109:506–10. Available from:  
881 <http://dx.doi.org/10.1073/pnas.1111262109>
- 882 7. Madrid VM, Taylor GT, Scranton MI, Chistoserdov AY. Phylogenetic diversity of bacterial and  
883 archaeal communities in the anoxic zone of the Cariaco Basin. *Appl Environ Microbiol* [Internet].  
884 2001;67:1663–74. Available from: <http://dx.doi.org/10.1128/AEM.67.4.1663-1674.2001>
- 885 8. Macalady JL, Lyon EH, Koffman B, Albertson LK, Meyer K, Galdenzi S, et al. Dominant  
886 microbial populations in limestone-corroding stream biofilms, Frasassi cave system, Italy. *Appl*  
887 *Environ Microbiol* [Internet]. 2006;72:5596–609. Available from:  
888 <http://dx.doi.org/10.1128/AEM.00715-06>
- 889 9. Macalady JL, Dattagupta S, Schaperdoth I, Jones DS, Druschel GK, Eastman D. Niche  
890 differentiation among sulfur-oxidizing bacterial populations in cave waters. *ISME J* [Internet].  
891 2008;2:590–601. Available from: <http://dx.doi.org/10.1038/ismej.2008.25>
- 892 10. Engel AS, Porter ML, Stern LA, Quinlan S, Bennett PC. Bacterial diversity and ecosystem  
893 function of filamentous microbial mats from aphotic (cave) sulfidic springs dominated by  
894 chemolithoautotrophic “Epsilonproteobacteria.” *FEMS Microbiol Ecol* [Internet]. 2004;51:31–53.  
895 Available from: <http://dx.doi.org/10.1016/j.femsec.2004.07.004>

- 896 11. Sarbu SM, Kinkle BK, Vlasceanu L, Kane TC, Popa R. Microbiological characterization of a  
897 sulfide-rich groundwater ecosystem. *Geomicrobiol J* [Internet]. Taylor & Francis; 1994;12:175–  
898 82. Available from: <https://doi.org/10.1080/01490459409377984>
- 899 12. Sharrar AM, Flood BE, Bailey JV, Jones DS, Biddanda BA, Ruberg SA, et al. Novel Large  
900 Sulfur Bacteria in the Metagenomes of Groundwater-Fed Chemosynthetic Microbial Mats in the  
901 Lake Huron Basin. *Front Microbiol* [Internet]. 2017;8:791. Available from:  
902 <http://dx.doi.org/10.3389/fmicb.2017.00791>
- 903 13. Williams TM, Unz RF. Filamentous sulfur bacteria of activated sludge: characterization of  
904 *Thiothrix*, *Beggiatoa*, and *Eikelboom* type 021N strains. *Appl Environ Microbiol* [Internet].  
905 1985;49:887–98. Available from: <http://dx.doi.org/10.1128/aem.49.4.887-898.1985>
- 906 14. Nelson DC, Jørgensen BB, Revsbech NP. Growth Pattern and Yield of a Chemoautotrophic  
907 *Beggiatoa* sp. in Oxygen-Sulfide Microgradients. *Appl Environ Microbiol* [Internet]. 1986;52:225–  
908 33. Available from: <http://dx.doi.org/10.1128/aem.52.2.225-233.1986>
- 909 15. Nielsen PH, de Muro MA, Nielsen JL. Studies on the in situ physiology of *Thiothrix* spp.  
910 present in activated sludge. *Environ Microbiol* [Internet]. 2000;2:389–98. Available from:  
911 <http://dx.doi.org/10.1046/j.1462-2920.2000.00120.x>
- 912 16. Hinck S, Neu TR, Lavik G, Mussmann M, de Beer D, Jonkers HM. Physiological adaptation  
913 of a nitrate-storing *Beggiatoa* sp. to diel cycling in a phototrophic hypersaline mat. *Appl Environ*  
914 *Microbiol* [Internet]. 2007;73:7013–22. Available from: <http://dx.doi.org/10.1128/AEM.00548-07>
- 915 17. Ehrlich HL, Newman DK. *Geomicrobiology*, Fifth Edition [Internet]. Taylor & Francis; 2008.  
916 Available from: <https://play.google.com/store/books/details?id=5D0-mwEACAAJ>
- 917 18. Sweerts J-PRA, Beer DD, Nielsen LP, Verdouw H, Van den Heuvel JC, Cohen Y, et al.  
918 Denitrification by sulphur oxidizing *Beggiatoa* spp. mats on freshwater sediments. *Nature*  
919 [Internet]. Nature Publishing Group; 1990 [cited 2022 Nov 11];344:762–3. Available from:  
920 <https://www.nature.com/articles/344762a0>
- 921 19. Rossetti S, Blackall LL, Levantesi C, Uccelletti D, Tandoi V. Phylogenetic and physiological  
922 characterization of a heterotrophic, chemolithoautotrophic *Thiothrix* strain isolated from  
923 activated sludge. *Int J Syst Evol Microbiol* [Internet]. 2003;53:1271–6. Available from:  
924 <http://dx.doi.org/10.1099/ijs.0.02647-0>
- 925 20. Inagaki F, Takai K, Nealson KH, Horikoshi K. *Sulfurovum lithotrophicum* gen. nov., sp. nov.,  
926 a novel sulfur-oxidizing chemolithoautotroph within the epsilon-Proteobacteria isolated from  
927 Okinawa Trough hydrothermal sediments. *Int J Syst Evol Microbiol* [Internet]. 2004;54:1477–82.  
928 Available from: <http://dx.doi.org/10.1099/ijs.0.03042-0>
- 929 21. Jones DS, Albrecht HL, Dawson KS, Schaperdoth I, Freeman KH, Pi Y, et al. Community  
930 genomic analysis of an extremely acidophilic sulfur-oxidizing biofilm. *ISME J* [Internet].  
931 2012;6:158–70. Available from: <http://dx.doi.org/10.1038/ismej.2011.75>
- 932 22. Hamilton TL, Jones DS, Schaperdoth I, Macalady JL. Metagenomic insights into S(0)  
933 precipitation in a terrestrial subsurface lithoautotrophic ecosystem. *Front Microbiol* [Internet].  
934 2014;5:756. Available from: <http://dx.doi.org/10.3389/fmicb.2014.00756>
- 935 23. Rossmassler K, Hanson TE, Campbell BJ. Diverse sulfur metabolisms from two  
936 subterranean sulfidic spring systems. *FEMS Microbiol Lett* [Internet]. 2016;363. Available from:

- 937 <http://dx.doi.org/10.1093/femsle/fnw162>
- 938 24. Meziti A, Nikouli E, Hatt JK, Konstantinidis KT, Kormas KA. Time series metagenomic  
939 sampling of the Thermopyles, Greece, geothermal springs reveals stable microbial communities  
940 dominated by novel sulfur-oxidizing chemoautotrophs. *Environ Microbiol* [Internet].  
941 2021;23:3710–26. Available from: <http://dx.doi.org/10.1111/1462-2920.15373>
- 942 25. Wrighton KC, Thomas BC, Sharon I, Miller CS, Castelle CJ, VerBerkmoes NC, et al.  
943 Fermentation, hydrogen, and sulfur metabolism in multiple uncultivated bacterial phyla. *Science*  
944 [Internet]. 2012;337:1661–5. Available from: <http://dx.doi.org/10.1126/science.1224041>
- 945 26. Brown CT, Hug LA, Thomas BC, Sharon I, Castelle CJ, Singh A, et al. Unusual biology  
946 across a group comprising more than 15% of domain Bacteria. *Nature* [Internet]. 2015;523:208–  
947 11. Available from: <http://dx.doi.org/10.1038/nature14486>
- 948 27. Hug LA, Baker BJ, Anantharaman K, Brown CT, Probst AJ, Castelle CJ, et al. A new view of  
949 the tree of life. *Nat Microbiol* [Internet]. 2016;1:16048. Available from:  
950 <http://dx.doi.org/10.1038/nmicrobiol.2016.48>
- 951 28. Parks DH, Chuvochina M, Waite DW, Rinke C, Skarszewski A, Chaumeil P-A, et al. A  
952 standardized bacterial taxonomy based on genome phylogeny substantially revises the tree of  
953 life. *Nat Biotechnol* [Internet]. 2018;36:996–1004. Available from:  
954 <http://dx.doi.org/10.1038/nbt.4229>
- 955 29. He X, McLean JS, Edlund A, Yooseph S, Hall AP, Liu S-Y, et al. Cultivation of a human-  
956 associated TM7 phylotype reveals a reduced genome and epibiotic parasitic lifestyle. *Proc Natl*  
957 *Acad Sci U S A* [Internet]. 2015;112:244–9. Available from:  
958 <http://dx.doi.org/10.1073/pnas.1419038112>
- 959 30. Bor B, Bedree JK, Shi W, McLean JS, He X. Saccharibacteria (TM7) in the Human Oral  
960 Microbiome. *J Dent Res* [Internet]. 2019;98:500–9. Available from:  
961 <http://dx.doi.org/10.1177/0022034519831671>
- 962 31. He C, Keren R, Whittaker ML, Farag IF, Doudna JA, Cate JHD, et al. Genome-resolved  
963 metagenomics reveals site-specific diversity of episymbiotic CPR bacteria and DPANN archaea  
964 in groundwater ecosystems. *Nat Microbiol* [Internet]. 2021;6:354–65. Available from:  
965 <http://dx.doi.org/10.1038/s41564-020-00840-5>
- 966 32. Vigneron A, Cruaud P, Culley AI, Couture R-M, Lovejoy C, Vincent WF. Genomic evidence  
967 for sulfur intermediates as new biogeochemical hubs in a model aquatic microbial ecosystem.  
968 *Microbiome* [Internet]. 2021;9:46. Available from: <http://dx.doi.org/10.1186/s40168-021-00999-x>
- 969 33. Hahn CR, Farag IF, Murphy CL, Podar M, Elshahed MS, Youssef NH. Microbial Diversity  
970 and Sulfur Cycling in an Early Earth Analogue: From Ancient Novelty to Modern Commonality.  
971 *MBio* [Internet]. 2022;13:e0001622. Available from: <http://dx.doi.org/10.1128/mbio.00016-22>
- 972 34. Rowland JC, Manga M, Rose TP. The influence of poorly interconnected fault zone flow  
973 paths on spring geochemistry. *Geofluids* [Internet]. Wiley; 2008;8:93–101. Available from:  
974 <https://onlinelibrary.wiley.com/doi/10.1111/j.1468-8123.2008.00208.x>
- 975 35. Kilcoyne ALD, Tyliczszak T, Steele WF, Fakra S, Hitchcock P, Franck K, et al.  
976 Interferometer-controlled scanning transmission X-ray microscopes at the Advanced Light  
977 Source. *J Synchrotron Radiat* [Internet]. 2003;10:125–36. Available from:

- 978 <http://dx.doi.org/10.1107/s0909049502017739>
- 979 36. Stöhr J. NEXAFS Spectroscopy [Internet]. Springer Science & Business Media; 1992.  
980 Available from: <https://play.google.com/store/books/details?id=N5NBD0393ZYC>
- 981 37. Ade H, Zhang X, Cameron S, Costello C, Kirz J, Williams S. Chemical contrast in X-ray  
982 microscopy and spatially resolved XANES spectroscopy of organic specimens. *Science*  
983 [Internet]. 1992;258:972–5. Available from: <http://dx.doi.org/10.1126/science.1439809>
- 984 38. Kirz J, Jacobsen C, Howells M. Soft X-ray microscopes and their biological applications. *Q*  
985 *Rev Biophys* [Internet]. 1995;28:33–130. Available from:  
986 <http://dx.doi.org/10.1017/s0033583500003139>
- 987 39. Comolli LR, Downing KH. Dose tolerance at helium and nitrogen temperatures for whole cell  
988 electron tomography. *J Struct Biol* [Internet]. 2005;152:149–56. Available from:  
989 <http://dx.doi.org/10.1016/j.jsb.2005.08.004>
- 990 40. Marcus MA, MacDowell AA, Celestre R, Manceau A, Miller T, Padmore HA, et al. Beamline  
991 10.3.2 at ALS: a hard X-ray microprobe for environmental and materials sciences. *J*  
992 *Synchrotron Radiat* [Internet]. 2004;11:239–47. Available from:  
993 <http://dx.doi.org/10.1107/S0909049504005837>
- 994 41. Fakra SC, Luef B, Castelle CJ, Mullin SW, Williams KH, Marcus MA, et al. Correlative  
995 Cryogenic Spectromicroscopy to Investigate Selenium Bioreduction Products. *Environ Sci*  
996 *Technol* [Internet]. 2018;52:503–12. Available from: <http://dx.doi.org/10.1021/acs.est.5b01409>
- 997 42. Peng Y, Leung HCM, Yiu SM, Chin FYL. IDBA-UD: a de novo assembler for single-cell and  
998 metagenomic sequencing data with highly uneven depth. *Bioinformatics* [Internet].  
999 2012;28:1420–8. Available from: <http://dx.doi.org/10.1093/bioinformatics/bts174>
- 1000 43. Parks DH, Imelfort M, Skennerton CT, Hugenholtz P, Tyson GW. CheckM: assessing the  
1001 quality of microbial genomes recovered from isolates, single cells, and metagenomes. *Genome*  
1002 *Res* [Internet]. 2015;25:1043–55. Available from: <http://dx.doi.org/10.1101/gr.186072.114>
- 1003 44. Guo J, Bolduc B, Zayed AA, Varsani A, Dominguez-Huerta G, Delmont TO, et al. VirSorter2:  
1004 a multi-classifier, expert-guided approach to detect diverse DNA and RNA viruses. *Microbiome*  
1005 [Internet]. 2021;9:37. Available from: <http://dx.doi.org/10.1186/s40168-020-00990-y>
- 1006 45. Nayfach S, Camargo AP, Schulz F, Eloë-Fadrosch E, Roux S, Kyrpides NC. CheckV  
1007 assesses the quality and completeness of metagenome-assembled viral genomes. *Nat*  
1008 *Biotechnol* [Internet]. 2021;39:578–85. Available from: <http://dx.doi.org/10.1038/s41587-020-00774-7>
- 1010 46. Shaffer M, Borton MA, McGivern BB, Zayed AA, La Rosa SL, Solden LM, et al. DRAM for  
1011 distilling microbial metabolism to automate the curation of microbiome function. *Nucleic Acids*  
1012 *Res* [Internet]. 2020;48:8883–900. Available from: <http://dx.doi.org/10.1093/nar/gkaa621>
- 1013 47. Sorek R, Zhu Y, Creevey CJ, Francino MP, Bork P, Rubin EM. Genome-wide experimental  
1014 determination of barriers to horizontal gene transfer. *Science* [Internet]. 2007;318:1449–52.  
1015 Available from: <http://dx.doi.org/10.1126/science.1147112>
- 1016 48. Minh BQ, Nguyen MAT, von Haeseler A. Ultrafast approximation for phylogenetic bootstrap.  
1017 *Mol Biol Evol* [Internet]. 2013;30:1188–95. Available from:

- 1018 <http://dx.doi.org/10.1093/molbev/mst024>
- 1019 49. Nguyen L-T, Schmidt HA, von Haeseler A, Minh BQ. IQ-TREE: a fast and effective  
1020 stochastic algorithm for estimating maximum-likelihood phylogenies. *Mol Biol Evol* [Internet].  
1021 2015;32:268–74. Available from: <http://dx.doi.org/10.1093/molbev/msu300>
- 1022 50. Letunic I, Bork P. Interactive Tree Of Life (iTOL) v5: an online tool for phylogenetic tree  
1023 display and annotation. *Nucleic Acids Res* [Internet]. 2021;49:W293–6. Available from:  
1024 <http://dx.doi.org/10.1093/nar/gkab301>
- 1025 51. Katoh K, Standley DM. MAFFT multiple sequence alignment software version 7:  
1026 improvements in performance and usability. *Mol Biol Evol* [Internet]. 2013;30:772–80. Available  
1027 from: <http://dx.doi.org/10.1093/molbev/mst010>
- 1028 52. Capella-Gutiérrez S, Silla-Martínez JM, Gabaldón T. trimAl: a tool for automated alignment  
1029 trimming in large-scale phylogenetic analyses. *Bioinformatics* [Internet]. 2009;25:1972–3.  
1030 Available from: <http://dx.doi.org/10.1093/bioinformatics/btp348>
- 1031 53. Price MN, Dehal PS, Arkin AP. FastTree 2--approximately maximum-likelihood trees for  
1032 large alignments. *PLoS One* [Internet]. 2010;5:e9490. Available from:  
1033 <http://dx.doi.org/10.1371/journal.pone.0009490>
- 1034 54. Matheus Carnevali PB, Schulz F, Castelle CJ, Kantor RS, Shih PM, Sharon I, et al.  
1035 Hydrogen-based metabolism as an ancestral trait in lineages sibling to the Cyanobacteria. *Nat*  
1036 *Commun* [Internet]. 2019;10:463. Available from: <http://dx.doi.org/10.1038/s41467-018-08246-y>
- 1037 55. Søndergaard D, Pedersen CNS, Greening C. HydDB: A web tool for hydrogenase  
1038 classification and analysis. *Sci Rep* [Internet]. 2016;6:34212. Available from:  
1039 <http://dx.doi.org/10.1038/srep34212>
- 1040 56. Gilchrist CLM, Chooi Y-H. Clinker & clustermap.js: Automatic generation of gene cluster  
1041 comparison figures. *Bioinformatics* [Internet]. 2021; Available from:  
1042 <http://dx.doi.org/10.1093/bioinformatics/btab007>
- 1043 57. Raveh-Sadka T, Thomas BC, Singh A, Firek B, Brooks B, Castelle CJ, et al. Gut bacteria  
1044 are rarely shared by co-hospitalized premature infants, regardless of necrotizing enterocolitis  
1045 development. *Elife* [Internet]. 2015;4. Available from: <http://dx.doi.org/10.7554/eLife.05477>
- 1046 58. Castelle CJ, Brown CT, Anantharaman K, Probst AJ, Huang RH, Banfield JF. Biosynthetic  
1047 capacity, metabolic variety and unusual biology in the CPR and DPANN radiations. *Nat Rev*  
1048 *Microbiol* [Internet]. 2018;16:629–45. Available from: <http://dx.doi.org/10.1038/s41579-018-0076-2>
- 1050 59. Zhou Z, Tran PQ, Breister AM, Liu Y, Kieft K, Cowley ES, et al. METABOLIC: High-  
1051 throughput profiling of microbial genomes for functional traits, biogeochemistry, and community-  
1052 scale metabolic networks [Internet]. *bioRxiv*. 2020 [cited 2022 Feb 7]. p. 761643. Available from:  
1053 <https://www.biorxiv.org/content/10.1101/761643v2>
- 1054 60. Jumper J, Evans R, Pritzel A, Green T, Figurnov M, Ronneberger O, et al. Highly accurate  
1055 protein structure prediction with AlphaFold. *Nature* [Internet]. 2021;596:583–9. Available from:  
1056 <http://dx.doi.org/10.1038/s41586-021-03819-2>
- 1057 61. Evans R, O'Neill M, Pritzel A, Antropova N, Senior A, Green T, et al. Protein complex

- 1058 prediction with AlphaFold-Multimer [Internet]. bioRxiv. 2022 [cited 2022 Jul 25]. p.  
1059 2021.10.04.463034. Available from:  
1060 <https://www.biorxiv.org/content/10.1101/2021.10.04.463034v2>
- 1061 62. Benzerara K, Yoon TH, Tyliszczak T, Constantz B, Spormann AM, Brown GE. Scanning  
1062 transmission X-ray microscopy study of microbial calcification. *Geobiology* [Internet]. Wiley;  
1063 2004;2:249–59. Available from: [https://onlinelibrary.wiley.com/doi/10.1111/j.1472-](https://onlinelibrary.wiley.com/doi/10.1111/j.1472-4677.2004.00039.x)  
1064 [4677.2004.00039.x](https://onlinelibrary.wiley.com/doi/10.1111/j.1472-4677.2004.00039.x)
- 1065 63. Toner BM, Fakra SC, Manganini SJ, Santelli CM, Marcus MA, Moffett JW, et al.  
1066 Preservation of iron(II) by carbon-rich matrices in a hydrothermal plume. *Nat Geosci* [Internet].  
1067 Nature Publishing Group; 2009 [cited 2022 Oct 30];2:197–201. Available from:  
1068 <https://www.nature.com/articles/ngeo433>
- 1069 64. Chan CS, Fakra SC, Emerson D, Fleming EJ, Edwards KJ. Lithotrophic iron-oxidizing  
1070 bacteria produce organic stalks to control mineral growth: implications for biosignature  
1071 formation. *ISME J* [Internet]. 2011;5:717–27. Available from:  
1072 <http://dx.doi.org/10.1038/ismej.2010.173>
- 1073 65. Brandes JA, Wirick S, Jacobsen C. Carbon K-edge spectra of carbonate minerals. *J*  
1074 *Synchrotron Radiat* [Internet]. 2010;17:676–82. Available from:  
1075 <http://dx.doi.org/10.1107/S0909049510020029>
- 1076 66. Lapidus A, Nolan M, Lucas S, Glavina Del Rio T, Tice H, Cheng J-F, et al. Genome  
1077 sequence of the filamentous, gliding *Thiothrix nivea* neotype strain (JP2(T)). *Stand Genomic Sci*  
1078 [Internet]. 2011;5:398–406. Available from: <http://dx.doi.org/10.4056/sigs.2344929>
- 1079 67. Friedrich CG, Bardischewsky F, Rother D, Quentmeier A, Fischer J. Prokaryotic sulfur  
1080 oxidation. *Curr Opin Microbiol* [Internet]. 2005;8:253–9. Available from:  
1081 <http://dx.doi.org/10.1016/j.mib.2005.04.005>
- 1082 68. Frigaard N-U, Dahl C. Sulfur metabolism in phototrophic sulfur bacteria. *Adv Microb Physiol*  
1083 [Internet]. 2009;54:103–200. Available from: [http://dx.doi.org/10.1016/S0065-2911\(08\)00002-7](http://dx.doi.org/10.1016/S0065-2911(08)00002-7)
- 1084 69. Handley KM, Bartels D, O’Loughlin EJ, Williams KH, Trimble WL, Skinner K, et al. The  
1085 complete genome sequence for putative H<sub>2</sub>- and S-oxidizer *Candidatus Sulfuricurvum* sp.,  
1086 assembled de novo from an aquifer-derived metagenome. *Environ Microbiol* [Internet].  
1087 2014;16:3443–62. Available from: <http://dx.doi.org/10.1111/1462-2920.12453>
- 1088 70. Finster K, Liesack W, Thamdrup B. Elemental sulfur and thiosulfate disproportionation by  
1089 *Desulfocapsa sulfoexigens* sp. nov., a new anaerobic bacterium isolated from marine surface  
1090 sediment. *Appl Environ Microbiol* [Internet]. 1998;64:119–25. Available from:  
1091 <http://dx.doi.org/10.1128/AEM.64.1.119-125.1998>
- 1092 71. Finster KW, Kjeldsen KU, Kube M, Reinhardt R, Musmann M, Amann R, et al. Complete  
1093 genome sequence of *Desulfocapsa sulfexigens*, a marine deltaproteobacterium specialized in  
1094 disproportionating inorganic sulfur compounds. *Stand Genomic Sci* [Internet]. 2013;8:58–68.  
1095 Available from: <http://dx.doi.org/10.4056/sigs.3777412>
- 1096 72. Motl N, Skiba MA, Kabil O, Smith JL, Banerjee R. Structural and biochemical analyses  
1097 indicate that a bacterial persulfide dioxygenase-rhodanese fusion protein functions in sulfur  
1098 assimilation. *J Biol Chem* [Internet]. 2017;292:14026–38. Available from:

- 1099 <http://dx.doi.org/10.1074/jbc.M117.790170>
- 1100 73. Zhang J, Liu R, Xi S, Cai R, Zhang X, Sun C. A novel bacterial thiosulfate oxidation pathway  
1101 provides a new clue about the formation of zero-valent sulfur in deep sea. *ISME J* [Internet].  
1102 2020;14:2261–74. Available from: <http://dx.doi.org/10.1038/s41396-020-0684-5>
- 1103 74. Berney M, Greening C, Conrad R, Jacobs WR Jr, Cook GM. An obligately aerobic soil  
1104 bacterium activates fermentative hydrogen production to survive reductive stress during  
1105 hypoxia. *Proc Natl Acad Sci U S A* [Internet]. 2014;111:11479–84. Available from:  
1106 <http://dx.doi.org/10.1073/pnas.1407034111>
- 1107 75. Pedroni P, Della Volpe A, Galli G, Mura GM, Pratesi C, Grandi G. Characterization of the  
1108 locus encoding the [Ni-Fe] sulfhydrogenase from the archaeon *Pyrococcus furiosus*: evidence  
1109 for a relationship to bacterial sulfite reductases. *Microbiology* [Internet]. 1995;141 ( Pt 2):449–  
1110 58. Available from: <http://dx.doi.org/10.1099/13500872-141-2-449>
- 1111 76. Jaffe AL, Castelle CJ, Matheus Carnevali PB, Gribaldo S, Banfield JF. The rise of diversity  
1112 in metabolic platforms across the Candidate Phyla Radiation. *BMC Biol* [Internet]. 2020;18:69.  
1113 Available from: <http://dx.doi.org/10.1186/s12915-020-00804-5>
- 1114 77. Olson JW, Maier RJ. Molecular hydrogen as an energy source for *Helicobacter pylori*.  
1115 *Science* [Internet]. 2002;298:1788–90. Available from:  
1116 <http://dx.doi.org/10.1126/science.1077123>
- 1117 78. Fritsch J, Scheerer P, Frielingsdorf S, Kroschinsky S, Friedrich B, Lenz O, et al. The crystal  
1118 structure of an oxygen-tolerant hydrogenase uncovers a novel iron-sulphur centre. *Nature*  
1119 [Internet]. 2011;479:249–52. Available from: <http://dx.doi.org/10.1038/nature10505>
- 1120 79. Wrighton KC, Castelle CJ, Varaljay VA, Satagopan S, Brown CT, Wilkins MJ, et al. RubisCO  
1121 of a nucleoside pathway known from Archaea is found in diverse uncultivated phyla in bacteria.  
1122 *ISME J* [Internet]. 2016;10:2702–14. Available from: <http://dx.doi.org/10.1038/ismej.2016.53>
- 1123 80. Sato T, Atomi H, Imanaka T. Archaeal type III RuBisCOs function in a pathway for AMP  
1124 metabolism. *Science* [Internet]. 2007;315:1003–6. Available from:  
1125 <http://dx.doi.org/10.1126/science.1135999>
- 1126 81. Luef B, Frischkorn KR, Wrighton KC, Holman H-YN, Birarda G, Thomas BC, et al. Diverse  
1127 uncultivated ultra-small bacterial cells in groundwater. *Nat Commun* [Internet]. 2015;6:6372.  
1128 Available from: <http://dx.doi.org/10.1038/ncomms7372>
- 1129 82. Jaffe AL, Konno M, Kawasaki Y, Kataoka C, Béjà O, Kandori H, et al. Saccharibacteria  
1130 harness light energy using type-1 rhodopsins that may rely on retinal sourced from microbial  
1131 hosts. *ISME J* [Internet]. 2022;16:2056–9. Available from: <http://dx.doi.org/10.1038/s41396-022-01231-w>
- 1133 83. Danczak RE, Johnston MD, Kenah C, Slattery M, Wrighton KC, Wilkins MJ. Members of the  
1134 Candidate Phyla Radiation are functionally differentiated by carbon- and nitrogen-cycling  
1135 capabilities. *Microbiome* [Internet]. 2017;5:112. Available from:  
1136 <http://dx.doi.org/10.1186/s40168-017-0331-1>
- 1137 84. Chaudhari NM, Overholt WA, Figueroa-Gonzalez PA, Taubert M, Bornemann TLV, Probst  
1138 AJ, et al. The economical lifestyle of CPR bacteria in groundwater allows little preference for  
1139 environmental drivers. *Environ Microbiome* [Internet]. 2021;16:24. Available from:



- 1140 <http://dx.doi.org/10.1186/s40793-021-00395-w>
- 1141 85. Cross KL, Campbell JH, Balachandran M, Campbell AG, Cooper CJ, Griffen A, et al.  
1142 Targeted isolation and cultivation of uncultivated bacteria by reverse genomics. *Nat Biotechnol*  
1143 [Internet]. 2019;37:1314–21. Available from: <http://dx.doi.org/10.1038/s41587-019-0260-6>
- 1144 86. Tian J, Utter DR, Cen L, Dong P-T, Shi W, Bor B, et al. Acquisition of the arginine deiminase  
1145 system benefits epiparasitic Saccharibacteria and their host bacteria in a mammalian niche  
1146 environment. *Proc Natl Acad Sci U S A* [Internet]. 2022;119. Available from:  
1147 <http://dx.doi.org/10.1073/pnas.2114909119>
- 1148 87. Bor B, Collins AJ, Murugkar PP, Balasubramanian S, To TT, Hendrickson EL, et al. Insights  
1149 Obtained by Culturing Saccharibacteria With Their Bacterial Hosts. *J Dent Res* [Internet].  
1150 2020;99:685–94. Available from: <http://dx.doi.org/10.1177/0022034520905792>
- 1151 88. Moreira D, Zivanovic Y, López-Archilla AI, Iniesto M, López-García P. Reductive evolution  
1152 and unique predatory mode in the CPR bacterium *Vampirococcus lugosii*. *Nat Commun*  
1153 [Internet]. 2021;12:2454. Available from: <http://dx.doi.org/10.1038/s41467-021-22762-4>
- 1154 89. Kuroda K, Yamamoto K, Nakai R, Hirakata Y, Kubota K, Nobu MK, et al. Symbiosis between  
1155 *Candidatus Patescibacteria* and Archaea Discovered in Wastewater-Treating Bioreactors. *MBio*  
1156 [Internet]. 2022;e0171122. Available from: <http://dx.doi.org/10.1128/mbio.01711-22>
- 1157 90. Ma K, Schicho RN, Kelly RM, Adams MW. Hydrogenase of the hyperthermophile  
1158 *Pyrococcus furiosus* is an elemental sulfur reductase or sulfhydrogenase: evidence for a sulfur-  
1159 reducing hydrogenase ancestor. *Proc Natl Acad Sci U S A* [Internet]. 1993;90:5341–4. Available  
1160 from: <http://dx.doi.org/10.1073/pnas.90.11.5341>
- 1161 91. Chapelle FH, O'Neill K, Bradley PM, Methé BA, Ciufo SA, Knobel LL, et al. A hydrogen-  
1162 based subsurface microbial community dominated by methanogens. *Nature* [Internet].  
1163 2002;415:312–5. Available from: <http://dx.doi.org/10.1038/415312a>
- 1164
